The iron-responsive genome of the chiton *Acanthopleura granulata*

Rebecca M. Varney<sup>1</sup>, Daniel I. Speiser<sup>2</sup>, Carmel McDougall<sup>3</sup>, Bernard M. Degnan<sup>4</sup>, and Kevin M. Kocot<sup>1,5</sup>

<sup>1</sup>The University of Alabama, Department of Biological Sciences

<sup>2</sup>University of South Carolina, Department of Biological Sciences

<sup>3</sup>Griffith University, Australian Rivers Institute

<sup>4</sup>University of Queensland, School of Biological Sciences

<sup>5</sup>The University of Alabama Museum of Natural History

Corresponding author:

Kevin M. Kocot

kmkocot@ua.edu

1 The iron-responsive genome of the chiton *Acanthopleura granulata*

2 Rebecca M. Varney<sup>1</sup>, Daniel I. Speiser<sup>2</sup>, Carmel McDougall<sup>3</sup>, Bernard M. Degnan<sup>4</sup>, and Kevin M. Kocot<sup>1,5</sup>

3

#### 4 **ABSTRACT**

5 Molluscs biomineralize structures that vary in composition, form, and function, prompting questions  
6 about the genetic mechanisms responsible for their production and the evolution of these mechanisms.  
7 Chitons (Mollusca, Polyplacophora) are a promising system for studies of biomineralization because they  
8 build a range of calcified structures including shell plates and spine- or scale-like sclerites. Chitons also  
9 harden the calcified teeth of their rasp-like radula with a coat of iron (as magnetite). Here we present  
10 the genome of the West Indian fuzzy chiton *Acanthopleura granulata*, the first from any aculiferan  
11 mollusc. The *A. granulata* genome contains homologs of many biomineralization genes identified  
12 previously in conchiferan molluscs. We expected chitons to lack genes previously identified from  
13 pathways conchiferans use to make biominerals like calcite and nacre because chitons do not use these  
14 materials in their shells. Surprisingly, the *A. granulata* genome has homologs of many of these genes,  
15 suggesting that the ancestral mollusc had a more diverse biomineralization toolkit than expected. The *A.*  
16 *granulata* genome has features that may be specialized for iron biomineralization, including a higher  
17 proportion of genes regulated directly by iron than other molluscs. *A. granulata* also produces two  
18 isoforms of soma-like ferritin: one is regulated by iron and similar in sequence to the soma-like ferritins  
19 of other molluscs, and the other is constitutively translated and is not found in other molluscs. The *A.*  
20 *granulata* genome is a resource for future studies of molluscan evolution and biomineralization.

#### 21 **KEY WORDS**

22 biomineralization, biomaterials, iron, ferritin, Iron response element (IRE), mollusc

#### 23 **SIGNIFICANCE STATEMENT**

24 Chitons are molluscs that make shell plates, spine- or scale-like sclerites, and iron-coated teeth.  
25 Currently, all molluscs with sequenced genomes lie within one major clade (Conchifera). Sequencing the  
26 genome of a representative from the other major clade (Aculifera) helps us learn about the origins and  
27 evolution of molluscan traits. The genome of the West Indian Fuzzy Chiton, *Acanthopleura granulata*,  
28 reveals chitons have homologs of many genes other molluscs use to make shells, suggesting all molluscs  
29 share some shell-making pathways. The genome of *A. granulata* has more genes that may be regulated  
30 directly by iron than other molluscs, and chitons produce a unique isoform of a major iron-transport  
31 protein (ferritin), suggesting that chitons have genomic specializations that contribute to their  
32 production of iron-coated teeth.

33

## 34 INTRODUCTION

35 Animals construct hardened structures by combining organic and inorganic components, a process  
36 termed biomineralization. To do so, they secrete proteins that initiate and guide the crystallization of  
37 inorganic molecules. Animals also incorporate proteins into biomineralized structures, enhancing their  
38 strength and flexibility (Cölfen 2010). Molluscs have long been models for studying the genetic  
39 mechanisms associated with biomineralization because they craft a wide range of materials into shells,  
40 spines, scales, and teeth (McDougall & Degnan 2018). The ability of molluscs to produce diverse  
41 biomineralized structures likely contributes to their remarkable morphological and ecological diversity.

42 Chitons (Polyplacophora, Figure 1A) are a promising model for investigating mechanisms of  
43 biomineralization because they build diverse mineralized structures distinct from those of other  
44 molluscs. The shells of all molluscs are composed of calcium carbonate ( $\text{CaCO}_3$ ), commonly in its crystal  
45 forms aragonite or calcite. Most molluscs build shells with alternating layers of aragonite and calcite,  
46 and many add an innermost layer of brick-like aragonite discs known as nacre. In contrast, chitons  
47 construct eight interlocking shell plates (Figure 1B) exclusively from aragonite and do not produce nacre.  
48 Also unlike other molluscs, chitons embed a network of sensory structures, termed aesthetes, into their  
49 shell plates. In some species, the aesthete network includes eyes with image-forming lenses made of  
50 aragonite (Speiser et al. 2011; Li et al. 2015); Figure 1C). To protect the soft girdle tissue surrounding  
51 their shell plates, chitons produce scale- or spine-like sclerites, which are also made of aragonite  
52 (Schwabe 2010; Sigwart et al. 2014; Checa et al. 2017).

53 Chitons biomineralize their teeth (Figure 1D) from a unique combination of materials. Most molluscs  
54 have a feeding organ, the radula, that bears rows of teeth built from chitin and, in many species,  
55 hardened with minerals such as calcium carbonate or silica. Chitons instead harden the cores of their  
56 teeth with calcium phosphate (as apatite), and then reinforce their cutting edges with iron (as  
57 magnetite) (Lowenstam 1962). These iron coatings allow chitons to scrape algae from rocks without  
58 rapidly dulling or damaging their teeth. Chitons produce new teeth throughout their lives, making new  
59 rows within days (Shaw et al. 2002; Joester & Brooker 2016). To make new teeth, chitons continuously  
60 sequester and transport high concentrations of iron (Kim et al. 1989; Shaw et al. 2002, 2010).  
61 Continuous iron biomineralization may thus present a physiological challenge to chitons because free  
62 iron causes oxidative stress (Dixon & Stockwell 2014).

63 To date, most investigations of biomineralization in molluscs have focused on species from the classes  
64 Bivalvia and Gastropoda. These, together with Monoplacophora, Cephalopoda, and Scaphopoda make  
65 up the clade Conchifera. The sister clade to Conchifera is Aculifera, which is made up of Polyplacophora  
66 and Aplacophora. Conchifera and Aculifera diverged approximately 550mya (Vinther et al. 2012; Kocot  
67 et al. 2020). To make robust predictions about molluscan evolution, reconstructions of ancestral  
68 character states must include information from both conchiferans and aculiferans (Sigwart & Sutton  
69 2007; Kocot et al. 2011; Smith et al. 2011; Vinther et al. 2012). Despite increasing numbers of  
70 sequenced molluscan genomes (e.g., Takeuchi et al. 2012; Zhang et al. 2012; Simakov et al. 2013;  
71 Albertin et al. 2015; Gómez-Chiarri et al. 2015; Modica et al. 2015; Kenny et al. 2015; Barghi et al. 2016;  
72 Davison et al. 2016; Murgarella et al. 2016; Adema et al. 2017; Du et al. 08 01, 2017; Nam et al. 05 01,  
73 2017; Schell et al. 2017; Sun et al. 2017; Wang et al. 2017; Calcino et al. 2018; Gerdol et al. 05 2018; Li et  
74 al. 04 01, 2018; Liu et al. 2018; Renaut et al. 07 01, 2018; Belcaid et al. 2019; Cai et al. 2019; Kijas et al.

2019; Masonbrink et al. 2019; McCartney et al. 2019; Zarrella et al. 2019; Sun et al. 2020), genomic resources for aculiferans remain unavailable. To advance the study of molluscan evolution and to better understand the genetic mechanisms of biomineralization, we sequenced the genome of the West Indian fuzzy chiton *Acanthopleura granulata*. Exploring the *A. granulata* genome allowed us to: 1) identify genes chitons may use to build their shell plates, sclerites, and teeth; 2) seek genomic signatures associated with the biomineralization of iron and the mitigation of iron-induced oxidative stress; and 3) better understand the origin and evolution of biomineralization in molluscs.

## 82 RESULTS AND DISCUSSION

83 We sequenced the genome of a single specimen of *A. granulata*. We combined reads from one lane of  
84 Illumina HiSeq X paired-end sequencing (124 Gb of 2 X 150 bp reads, ~204X coverage) with reads from  
85 four Oxford Nanopore flowcells run on the GridION platform (22.87 Gb, 37X coverage). Using the hybrid  
86 assembler MaSuRCA and optical mapping, we produced a haploid genome assembly for *A. granulata*  
87 that is 606.9 Mbp, slightly smaller than the 743 Mbp haploid genome size estimated by flow cytometry  
88 (Roebuck 2017). The assembled *A. granulata* genome consists of 87 scaffolds ranging in size from 50.9  
89 Mb to 0.05 Mb, plus a single mitochondrial genome of 15,665 bp. Several of these scaffolds are similar  
90 in length to intact chromosomes from other molluscs (Sun et al. 2017, 2020; Bai et al. 2019). To verify  
91 completeness of the assembly, we mapped genomic short-read data to the genome; 85.31% of reads  
92 mapped perfectly, so we are confident the assembly encompasses a majority of sequencing data. The *A.*  
93 *granulata* genome has an N50 value of 23.9 Mbp and a BUSCO completeness score of 97.4%, making it  
94 more contiguous and complete than most currently available molluscan genomes (Supplementary  
95 Figure 1; Supplementary Table 1; visualized in Supplementary Figure 2).

96 We generated gene models for *A. granulata* by 1) sequencing transcriptomes from eight different  
97 tissues from the same specimen used for genome sequencing, 2) combining these transcriptomes into a  
98 single assembly and aligning the combined transcriptome to the genome, and 3) training *de novo* gene  
99 predictors using both our combined transcriptome and protein sequences predicted from the  
100 transcriptomes of other aculiferans. Following these steps, we produced a set of 81,691 gene models  
101 that is 96.9% complete according to a BUSCO transcriptomic analysis. This score is similar to the  
102 completeness score of the *A. granulata* genome, so it is likely this set of gene models missed few genes,  
103 if any, in the genome assembly. However, of the BUSCO genes expected to be single-copy in all animals,  
104 17.2% were represented by multiple gene models. Using Markov clustering to eliminate redundant  
105 isoforms, we generated a reduced set of 20,470 gene models that is 94.7% complete. In this smaller set  
106 of gene models, only 0.5% of the BUSCO genes have multiple copies, supporting Markov clustering as an  
107 effective method for reducing the redundancy of gene models. To characterize proteins based on shared  
108 functional domains and sequence similarity, we analyzed the set of 20,470 gene models with  
109 InterProScan. We identified at least one GO term for 12,301 genes and a Pfam match for 15,710 genes.  
110 We also conducted a KEGG analysis and identified 7,341 proteins that could be assigned to putative  
111 molecular pathways.

112 To provide a robust dataset for phylogenetic analysis and gene family evolution analyses, we identified  
113 homologous genes shared between *A. granulata* and other molluscs. We used the larger set of gene  
114 models from *A. granulata* to ensure a more complete input dataset, knowing that any duplicate gene  
115 models for the same locus would cluster within the same orthologous group. We compared gene

116 models from the *A. granulata* genome to those from the genomes of nineteen other lophotrochozoans,  
117 including fourteen molluscs, two annelids, one brachiopod, one phoronid, and one nemertean. This  
118 resulted in 59,276 groups of homologous sequences including 3,379 found in all 20 genomes.

119 We used a tree-based approach to identify orthologous genes shared among all 20 taxa and  
120 reconstructed molluscan phylogeny using the 2,593 orthologs present in at least 17 of the 20 genomes  
121 we searched. This dataset totaled 950,322 amino acid positions with 16.2% missing data. We recovered  
122 *A. granulata* as the sister taxon of all other molluscs with sequenced genomes (Figure 1F). We  
123 conducted an additional phylogenetic analysis that included more taxa by using transcriptomes in  
124 addition to genomes and recovered *Acanthopleura* within the family Chitonidae in the order Chitonida,  
125 consistent with recent phylogenetic studies of chitons based on fewer loci (Irisarri et al. 2020);  
126 Supplementary Figure 3).

### 127 **The *A. granulata* genome differs from conchiferan genomes in content and organization**

128 The *A. granulata* genome has a heterozygosity of 0.653%, making it one of the least heterozygous  
129 molluscan genomes sequenced to date (Supplementary Figure 4). High heterozygosity is often attributed  
130 to high rates of gene flow associated with broadcast spawning and far-dispersing larvae (Solé-Cava &  
131 Thorpe 1991), and it is frequently noted as an obstacle to genome assembly in molluscs (Zhang et al.  
132 2012; Wang et al. 2017; Powell et al. 2018; Thai et al. 2019). We expected the genome of *A. granulata* to  
133 have high heterozygosity because this species is a broadcast spawner with a wide geographic range  
134 (Glynn 1970). To compare heterozygosity across molluscs, we selected a set of high-quality molluscan  
135 genomes for which short-read data are available (Supplementary Table 1). Using k-mer based analysis,  
136 we found the highest heterozygosity among the seven genomes we analyzed was 3.15% in the blood  
137 clam *S. broughtonii*, and the other genomes had heterozygosities between those of *A. granulata* and *S.*  
138 *broughtonii*. Our findings indicate that heterozygosity may be influenced by more than an animal's  
139 reproductive mode, larval type, and geographic range (Supplementary Table 2), and that molluscan  
140 genomes should not be assumed to have high heterozygosity.

141 The *A. granulata* genome is arranged differently than other molluscan genomes and has fewer repetitive  
142 elements. Compared to a non-molluscan lophotrochozoan, *Lingula anatina* (a brachiopod), *A. granulata*  
143 has more repetitive elements of certain types in its genome. Conversely, *A. granulata* has fewer  
144 repetitive elements in its genome than any conchiferan mollusc (Supplementary Table 2). This suggests  
145 multiple proliferations of repetitive elements during molluscan evolution. Repetitive elements  
146 contribute to structural changes in genomes by providing breakpoints that increase the likelihood of  
147 chromosomal rearrangements (Weckselblatt & Rudd 2015). Consistent with this prediction, synteny is  
148 lower between *A. granulata* and all conchiferan molluscs we examined than it is between any two of  
149 these conchiferans, and the genomes of conchiferans and *A. granulata* have little synteny with the  
150 genome of *L. anatina* (Supplementary Figure 5). A recent study found greater conservation of bilaterian  
151 ancestral linkage groups (ALGs) between a scallop and non-molluscs than between other bivalves and  
152 non-molluscs, suggesting substantial genomic rearrangements occurred within bivalves (Wang et al.  
153 2017). Molluscan genomes appear to rearrange frequently across evolutionary time, and perhaps  
154 rearrange more frequently in conchiferans due to the proliferation of repetitive elements. However,  
155 limited synteny between *A. granulata* and the scallop genome suggests that the chiton genome has also

156 undergone significant rearrangement relative to the hypothetical ancestral bilaterian genome  
157 organization.

158 The Hox cluster is a widely conserved set of regulatory genes that contribute to the patterning of the  
159 anterior-posterior axes in bilaterian animals. In lophotrochozoans, the genes are typically collinear,  
160 beginning with *Hox1* and ending with *Post1*. Although several gastropods and bivalves possess intact  
161 Hox clusters, this cluster is dispersed in some bivalves and cephalopods (Albertin et al. 2015; Barucca et  
162 al. 2016; Belcaid et al. 2019; Wang et al. 2017). The Hox cluster of *A. granulata* lacks *Post1*, but is  
163 otherwise intact and collinear (Figure 2). Given current understanding of molluscan phylogeny, the order  
164 of Hox genes shared between *A. granulata* and most conchiferans likely represents the ancestral order  
165 of Hox genes in molluscs (Wanninger & Wollesen 2019); Figure 2). *Post1* is also absent in two species of  
166 chitons from the suborder Acanthochitonina, the sister clade to Chitonina, to which *A. granulata*  
167 belongs (Huan et al. 2019; Wanninger & Wollesen 2019). However, *Post1* is present in aplacophorans  
168 (Iijima et al. 2006), suggesting it was lost in chitons. In conchiferan molluscs, *Post1* helps specify the  
169 posterior of an animal during development and helps pattern shell formation (Lee et al. 2003; Fröbius et  
170 al. 2008; Schiemann et al. 2017; Huan et al. 2019). In the absence of *Post1*, *A. granulata* and other  
171 chitons must use other transcription factors to help pattern their body axes and biomineralized  
172 structures.

### 173 ***Acanthopleura granulata* shares many biomineralization genes with conchiferan molluscs**

174 We expected chitons to lack many genes previously identified in molluscan biomineralization pathways  
175 because their shell plates and sclerites lack both calcite and nacre. We were surprised to find homologs  
176 in the *A. granulata* genome of many biomineralization genes known from conchiferans (Supplementary  
177 Table 4). For example, we found an ortholog in *A. granulata* for *Pif*. In pterid bivalves, the *Pif* mRNA  
178 encodes a protein that is cleaved into two peptides, PIF97 and PIF80 (Suzuki et al. 2009). These peptides  
179 have different roles in biomineralization: PIF80 binds nacre and aids in nacre formation (Suzuki et al.  
180 2009), whereas PIF97 binds to chitin and guides the growth of calcium carbonate crystals (Suzuki et al.  
181 2013). A recent study in the gastropod *Lymnaea stagnalis* identified a PIF-like protein that does not  
182 promote nacre production, but is expressed in tissues that suggest this PIF protein still plays a role in  
183 shell biomineralization (Ishikawa et al. 2020). We found that *A. granulata* possesses a *Pif* homolog, but  
184 appears to only produce PIF97 rather than two separate peptides. The expression of *Pif* mRNA was  
185 highest in girdle tissue in *A. granulata* and lowest in the radula, suggesting that PIF peptides may play a  
186 role in sclerite formation in chitons (Supplementary Table 4). We hypothesize that the last common  
187 ancestor of extant molluscs used PIF97 to help build mineralized structures, and that production of  
188 PIF80 is novel to bivalves.

189 The ancestral mollusc likely produced mineralized structures, but whether the ancestral mollusc had a  
190 single shell, multiple shell plates, or sclerites remains a matter of debate (Scherholz et al. 2013; Vinther  
191 et al. 2017; Giribet & Edgecombe 2020; Kocot 01/2013). Molluscs form mineralized structures by  
192 making extracellular matrices from organic components such as polysaccharides and proteins, and then  
193 hardening them with minerals (Furuhashi et al. 2009). Similarities between the extracellular matrices of  
194 different biomineralized structures suggest these structures share developmental mechanisms. The *A.*  
195 *granulata* genome includes genes known from conchiferan molluscs to be associated with extracellular  
196 matrices. Chitin is a major component of the extracellular matrices of all molluscan shells and radulae,



197 and the *A. granulata* genome contains genes for chitin synthase, chitinase, and chitin-binding proteins.  
198 We also found homologs of lustrin and dermatopontin, two proteins expressed in the extracellular  
199 matrices of conchiferans that increase the elasticity and flexibility of their shells (Gaume et al. 2014);  
200 Supplementary Table 5).

201 Silk-like structural proteins are components of many biological materials, including shells (Eisoldt et al.  
202 2011; McDougall et al. 2016; Xu et al. 2016), and several *A. granulata* genes are similar to genes known  
203 to code for silk-like proteins. These proteins are “silk-like” because they contain highly repetitive  
204 sequences of amino acids that fold into secondary structures (commonly  $\beta$ -pleated sheets) that impart  
205 flexibility, a phenomenon first documented in spider silk (Lewis 2006; Eisoldt et al. 2011). Silk-like  
206 domains can facilitate the precipitation and crystallization of minerals that help form structures such as  
207 bones and shells (Xu et al. 2016). We found 31 genes that code for proteins with silk-like domains in the  
208 *A. granulata* genome, 23 of which have high sequence similarity to characterized molluscan  
209 biomineralization genes (Supplementary Table 6). We found 27 of these 31 genes code for proteins with  
210 signal peptides, indicating they may be secreted as part of the extracellular matrix during  
211 biomineralization (Supplementary Table 6). Among these genes, we found three collagens, one  
212 chitinase, and one carbonic anhydrase, all possible contributors to shell formation and repair (Patel  
213 2004); Supplementary Table 6). Several of the genes encoding proteins with silk-like domains are highly  
214 expressed in the girdle of *A. granulata*, suggesting a role in the mineralization of sclerites  
215 (Supplementary Figure 6).

#### 216 ***A. granulata* has more genes with iron response elements (IREs) than other molluscs**

217 Chitons have more iron in their hemolymph than any other animal studied to date (Kim et al. 1988). Iron  
218 presents physiological challenges to animals because iron can cause oxidative stress. We hypothesize  
219 that the ability of chitons to biomineralize iron requires them to respond quickly to changes in  
220 concentration of this potentially toxic metal. To assess the iron-responsiveness of the *A. granulata*  
221 genome, we searched it for iron response elements (IREs), three-dimensional hairpin structures that  
222 form in either the 3' or 5' untranslated regions (UTRs) of mRNA molecules and control translation via  
223 binding by iron regulatory protein (IRP; Supplementary Figure 7). We also examined IREs in several high-  
224 quality molluscan genomes that include UTRs as part of their available annotation data. All of the  
225 molluscan genomes we examined had similar proportions of 3' to 5' IREs (Figure 3A). Despite having the  
226 fewest gene models, the genome of *A. granulata* has more IREs than the genomes of any other mollusc  
227 we examined. We predicted 271 IREs in the *A. granulata* genome, compared with an average of 119 IREs  
228 across other molluscan genomes (Supplementary Table 7). The highest number of predicted IREs in a  
229 conchiferan came from the genome of the blood clam *Scapharca broughtonii*, which had 201. The blood  
230 clam is so named because it is one of relatively few molluscs that produces hemoglobin for use as a  
231 respiratory pigment (Kawamoto 1928; Manwell 1963; Read 1966; Collett & O’Gower 1972; Bai et al.  
232 2019). We expect *A. granulata* and *S. broughtonii* have more IREs in their genomes than other molluscs  
233 because they must absorb and transport larger amounts of iron to produce iron-coated teeth and  
234 hemoglobin, respectively.

235 We next asked if the expression of genes with IREs in *A. granulata* differs between iron-rich and iron-  
236 poor tissues. In the absence of iron, IRPs bind IREs. When this occurs in the 5' UTR of an mRNA,  
237 ribosomes are blocked from translating the protein; thus, mRNAs with 5' IREs will not be translated in

238 the absence of free iron. When IRPs bind IREs in the 3' UTR of an mRNA, they block endonucleases from  
239 degrading the mRNA, allowing multiple translations from a single mRNA molecule; thus, the translation  
240 of mRNAs with 3' IREs is higher in the absence of free iron (Supplementary Figure 7). We compared the  
241 expression of genes with IREs between transcriptomes sequenced from the foot, girdle, ctenidia, and  
242 four developmentally-distinct regions of the radula from the same specimen of *A. granulata* we used for  
243 genome sequencing, and found expression of genes with IREs in all tissue types (Figure 3B). We  
244 quantified the expression of genes that contained 3' IREs and 5' IREs separately and found many genes  
245 with 5' IREs had higher expression in the three anterior, iron-rich regions of the radula than the rest of  
246 the body (Supplemental Figure 8). Genes with 5' IREs that are expressed in iron-rich tissues are likely  
247 transcribed into proteins in only those tissues because elsewhere in the body IRPs will bind to IREs and  
248 block translation. Consequently, the proteins encoded by these genes may be unique to the radula.

249 After identifying genes in *A. granulata* that contain 5' IREs and are expressed at relatively high levels in  
250 the iron-rich anterior regions of the radula, we asked if these genes might have roles in the  
251 biomineralization of the radula. We used GO analysis to compare the molecular functions of the protein  
252 sequences coded by the genes with 5' IREs to the protein sequences coded by the full set of genes from  
253 the *A. granulata* genome. We found that genes with a 5' IRE that are highly expressed in the anterior of  
254 the radula are more likely to be associated with the molecular functions 'response to inorganic  
255 substance', 'response to calcium ion', and 'response to metal ion' (Supplementary Figure 9). This  
256 suggests that genes with a 5' IRE that are highly expressed in the radula may be involved in the  
257 biomineralization of the apatite (calcium) cores of teeth and their magnetite (iron) caps. A previous  
258 study by Nemoto et al. identified a novel biomineralization protein (RTMP1) in the radula of another  
259 chiton (*Cryptochiton stelleri*), and proposed that RTMP1 played a role in iron biomineralization (Nemoto  
260 et al. 2019). We examined the mRNA of RTMP1 in *C. stelleri* and did not detect an IRE in either its 5' or 3'  
261 UTR. Thus there are genes that may be important to biomineralization in the chiton radula whose  
262 expression levels are not influenced by IREs.

### 263 **Two isoforms of ferritin may provide chitons with tissue-specific protection from oxidative stress**

264 All metazoans require iron. However, free iron poses a threat to animals because it catalyzes the  
265 production of reactive oxygen species, which inflict damage on DNA and tissues (Dixon & Stockwell  
266 2014). To transport iron safely, metazoans use the iron-binding protein ferritin. Previous work suggests  
267 that chitons use ferritin to transport iron to their radula (Kim et al. 1988). An iron response element  
268 (IRE) is present in the 5' UTR of the heavy chain (or soma-like) ferritin that is expressed by all metazoans  
269 (Piccinelli & Samuelsson 2007-7). We found two isoforms of heavy chain ferritin in our gene models for  
270 *A. granulata*: a first isoform (isoform 1) that contains the conserved 5' IRE, and a second isoform  
271 (isoform 2) that does not (Figure 4A).

272 Isoform 1 of ferritin from *A. granulata* contains an IRE in the 5' UTR, allowing this isoform to be  
273 translated only in the presence of free iron. By regulating the translation of ferritin, cells can transcribe  
274 ferritin mRNA continuously so they are primed to produce large quantities of ferritin protein rapidly if  
275 conditions require it. If no free iron is present, IRP will bind to the IRE and block translation. We found  
276 isoform 1 of ferritin is expressed at similar levels in all the transcriptomes we sequenced for *A.*  
277 *granulata*, including those for the foot, girdle, gonad, ctenidia, and all four regions of the radula (Figure  
278 4B). Thus, when *A. granulata* needs to bind excess iron, it may be able to rapidly produce isoform 1 of



279 ferritin protein throughout its body. We examined other mollusc genomes and transcriptomes and  
280 found a ferritin isoform present in all of them that is similar to *A. granulata* isoform 1 and contains the  
281 5' IRE .

282 Isoform 2 of ferritin in *A. granulata* lacks the 5' IRE present in isoform 1. We identified an alternative  
283 transcription initiation site downstream of ferritin exon 1 in the *A. granulata* genome. Isoform 2 of  
284 ferritin, initiated at this downstream site, contains a different exon 1 than isoform 1 of ferritin, but  
285 shares exons 2-4 with isoform 1 (Figure 4). We examined other molluscan genomes and transcriptomes  
286 and did not find evidence for expression of a ferritin isoform similar to *A. granulata* isoform 2 (data  
287 available on Dryad). In *A. granulata*, transcripts of isoform 2 are expressed at a lower level than isoform  
288 1 throughout all body tissues (foot, girdle, gonad, ctenidia) and in the posterior region of the radula that  
289 lacks iron mineralization (Figure 4B). Expression of isoform 2 is almost undetectable in the iron-rich  
290 regions of the radula. Without the 5' IRE, translation of the mRNA of isoform 2 is not blocked in the  
291 absence of free iron. The 5' IRE in ferritin is an important regulatory mechanism for protein production.  
292 In rats, for example, the expression of ferritin mRNAs is relatively constant across tissues but protein  
293 levels vary (Rogers & Munro 1987). Further, mutations in the 5' IRE of ferritin cause hyperferritinaemia  
294 in mammals, an iron-related medical condition caused by an overproduction of ferritin protein  
295 (Thomson et al. 1999). We hypothesize that chitons use isoform 2 of ferritin to produce a low level of  
296 ferritin protein constitutively in tissues outside their radula as protection from the high concentrations  
297 of iron circulating through their bodies.

## 298 **Conclusions**

299 The *A. granulata* genome is the first available genome for any chiton or any aculiferan. The information  
300 it provides improves our understanding of the evolution of biomineralization across Mollusca as well as  
301 lineage-specific innovations within chitons. Chitons are a valuable system for investigating  
302 biomineralization because they produce shell plates, sclerites, and iron-clad teeth. The unique  
303 combination of structures produced by chitons makes the *A. granulata* genome a resource for future  
304 studies of biomineralization. Although many genes involved in mollusc shell secretion are rapidly  
305 evolving (Jackson et al. 2006; Kocot et al. 2016), we were able to identify homologs of many conchiferan  
306 biomineralization genes in the *A. granulata* genome. The expression of several genes associated with  
307 conchiferan shell secretion in the girdle of *A. granulata* suggests these genes may function in sclerite  
308 biomineralization in chitons. This suggests a common underlying biomineralization mechanism for  
309 conchiferan shells and aculiferan sclerites, structures known to share some developmental pathways  
310 even though they arise via different cell lineages (Wollesen et al. 2017).

311 All metazoans require iron, but they must balance iron use against potential oxidative damage.  
312 Regulating iron is a particular concern for chitons because they biomineralize their teeth with  
313 magnetite. The genome of *A. granulata* contains more genes with iron response elements (IREs) than  
314 the genome of any other mollusc examined to date, indicating it has a larger proportion of genes  
315 regulated directly by iron. We identified two isoforms of ferritin in *A. granulata*, one that is iron-  
316 responsive and a second that is constitutively translated. We propose the second isoform of ferritin  
317 protects tissues outside the radula from oxidative stress by binding free iron. Chitons are an emerging  
318 model for studies of both biomineralization and iron homeostasis. The *A. granulata* genome will aid

319 future studies by suggesting specific proteins and pathways to target with comparative studies of gene  
320 expression and gene manipulation.

## 321 **METHODS**

### 322 *Specimen collection and preservation*

323 We collected a single male specimen of *Acanthopleura granulata* from Harry Harris State Park in the  
324 Florida Keys (Special Activity License #SAL-17-1983-SR). We cut the majority of the foot into ~1 mm<sup>2</sup>  
325 cubes and froze them at -80°C. We froze additional pieces of foot, girdle (dissected such that the tissue  
326 sample would not contain shell secretory tissue), ctenidia, gonad, and radula in RNAlater and stored  
327 them at -80°C as well.

### 328 *Genome and transcriptome sequencing*

329 We extracted high molecular weight DNA from frozen samples of foot tissue from *A. granulata* using a  
330 CTAB-phenol chloroform method. We cleaned DNA for short read generation with the Zymo Clean and  
331 Concentrator Kit. For library preparation and sequencing, we sent cleaned DNA to the Genomics  
332 Services Lab at HudsonAlpha (Huntsville, AL), where it was sheared with a Covaris M220 to an average  
333 fragment size of 350 bp. These fragments were used to prepare an Illumina TruSeq DNA PCR-Free  
334 library, which was sequenced using one lane of an Illumina HiSeq X (2 X 150 bp paired-end reads).

335 For long-read sequencing, we cleaned DNA and enriched it for higher-molecular weight fragments by  
336 performing two sequential purifications using 0.4X AmPureXP magnetic beads. We generated long reads  
337 with four flow cells on an Oxford Nanopore Technologies GridION. We prepared two sequencing  
338 libraries with ligation kit LSK-108 and sequenced them on FloMin106 (R9.4.1) flow cells. We prepared  
339 the other two sequencing libraries with the updated ligation kit LSK-109 and sequenced them on  
340 R9.4.1RevD flow cells. We generated 2.19Gb, 4.41Gb, 7.87 Gb, and 8.4 Gb respectively across the four  
341 flow cells, for a total of 22.87 Gb, or >20x coverage with long-reads. Reads were basecalled with Guppy  
342 4.0. We trimmed long reads with PoreChop (Wick 2018), which was set to remove chimeras  
343 (approximately 0.0005% of reads) and all residual adapter sequences.

344 To generate transcriptomes, we used the Omega Bio-tek EZNA Mollusc RNA Kit to extract RNA from  
345 girdle, ctenidia, gonad, foot, and four regions of radula (representative of visibly different stages of iron  
346 mineralization) of the same individual of *A. granulata* we used for genome sequencing. We synthesized  
347 and amplified complementary DNA (cDNA) from each tissue using the SmartSeq v4 Ultra Low-input RNA  
348 kit (Clontech) from 1 ng of input RNA with 17 cycles of PCR. We created eight dual-indexed sequencing  
349 libraries with the Illumina Nextera XT kit, using 1 ng of input cDNA. We sent the eight libraries to  
350 Macrogen (Seoul, South Korea) where they were pooled and sequenced on one lane of an Illumina  
351 HiSeq 4000 (2 x 100 bp paired-end reads).

### 352 *Genome and transcriptome assembly and quality assessment*

353 We initially assembled the chiton genome with MaSuRCA v. 3.3.5 (Zimin et al. 2013), which consolidates  
354 paired-end data into super reads and then uses long-read data to scaffold and gap-fill. This produced an  
355 assembly with 2,858 contigs. We filtered and collapsed heterozygous contigs with Redundans v. 0.14a  
356 (Pryszcz & Gabaldón 07 08, 2016), decreasing the assembly to 1,285 contigs. To ensure that no contigs  
357 were incorrectly removed, we verified that all pre-Redundans contigs mapped to the post-Redundans  
358 assembly with bowtie2 (Langmead & Salzberg 2012); all contigs mapped and thus non-redundant data

359 were not deleted. To help decontaminate reads and contigs, we used the Blobtools2 Interface to create  
360 blob plots (Blaxter & Challis 2018). Because Blobtools uses the NCBI nucleotide database to determine  
361 the identity of each scaffold, and chordate sequences vastly outnumber molluscan sequences in NCBI,  
362 Blobtools identified a large proportion of scaffolds as chordate. We identified contaminants as  
363 sequences that differed from the majority of scaffolds in both GC content and coverage and used BLAST  
364 to verify these sequences as bacterial before removing them from the assembly.

365 We scaffolded this reduced assembly with one lane of Bionano SAPHYR optical mapping, using two  
366 enzymes (BssSI and DLE1) and Bionano Solve v3.4's scaffolding software, which resulted in 87 scaffolds.  
367 We ran REAPR v. 1.0.18 (Hunt et al. 2013), which map short read data and collect mapping statistics  
368 simultaneously, to determine accuracy of the assembly overall relative to all short-read data generated,  
369 and found despite reducing heterozygosity in the final assembly, 85.31% of paired-end reads map  
370 perfectly back to the genome assembly, indicating a complete genome assembly relative to the paired-  
371 end data.

372 To assess our genome assembly, we ran QUAST v. 5.0.2 (Gurevich et al. 2013). We assessed genome  
373 completeness with BUSCO v. 4.0.2 (Simão et al. 2015), using the proportions of nuclear protein-coding  
374 genes thought to be single-copy in the genomes of diverse metazoans (Metazoa odb9 dataset) and  
375 estimating the proportion of those that were complete, duplicated, fragmented, and absent.

376 We assembled the eight *A. granulata* transcriptomes with Trinity v. 2.84 (Grabherr et al. 2011), using the  
377 --trimomatic and --normalize reads flags. We ran CD-Hit v. 4.8.1 (Fu et al. 2012) on each transcriptome  
378 separately to cluster isoforms. We also generated a composite transcriptome of all eight tissues (eight  
379 total transcriptomes including four separate radula regions) by combining reads and then following the  
380 same process described above. We used this composite transcriptome for annotation.

### 381 *Genome annotation*

382 To annotate the *A. granulata* genome, we first generated a custom repeat library with RepeatModeler v.  
383 2.0 (Smit & Hubley 2008-2015), which was used in all subsequent analyses. We trained MAKER v.  
384 2.31.10 (Cantarel et al. 2008-1) on the composite transcriptome described above as well as predicted  
385 protein sequences from several other species of chitons that were generated previously (see  
386 Supplementary File 1). Using the highest quality gene models from the first as a maker-input gff3 (AED  
387 <0.5), we ran a second round of MAKER. From these resulting gene models, we used those with an AED  
388 <0.25 to train Augustus v3.0.3 (Stanke et al. 2006): we extracted gene models from the genomic  
389 scaffolds along with 1,000 bp of flanking sequence on either side to ensure complete genes, and ran  
390 them through BUSCO to produce an Augustus model (.hmm) file. Separately, we ran PASA 2.4.1 (Haas et  
391 al. 2003) on our composite transcriptome to maximize mapping transcripts to the genome assembly. We  
392 combined results from PASA and a trained Augustus run using the intersect tool in BEDtools v. 2.29.2  
393 (Quinlan & Hall 2010), which removed identical sequences. This yielded a set of 81,691 gene models.  
394 When we ran a BUSCO v. 3.9 analysis (Metazoa odb9 dataset), we found a 15.2% duplication rate. To  
395 decrease duplications caused by transcripts predicted for the same locus by both Augustus and PASA  
396 that varied in length (and thus were not removed by the BEDtools intersect tool), we clustered the first  
397 set of gene models using cdhit-EST v. 4.8.1 (Fu et al. 2012), which we ran with the slow-but-accurate (-g)

398 flag and with a cluster threshold value of 0.8. This produced a set of 20,470 genes. All commands we  
399 used are available in Appendix 1.

400 To identify annotated proteins in *A. granulata*, we first used Transdecoder (Douglas 2018) to produce  
401 peptide files of predicted proteins. We ran Interproscan on the set of 20,470 genes referenced above to  
402 identify GO terms and Pfam matches for proteins where possible. We used GHOSTX in the Kaas pipeline  
403 (Moriya et al. 2007) to identify KEGG pathways via comparisons to all the available molluscan taxa  
404 (*Lottia gigantea*, *Pomacea canaliculata*, *Crassostrea gigas*, *Mizuhopecten yessoensis*, and *Octopus*  
405 *bimaculoides*). Finally, we looked for shared GO terms between specific taxa with OrthoVenn(Xu et al.  
406 2019), comparing *A. granulata* to *Lottia gigantea*, *Chrysomallon squaminiferon*, *Octopus bimaculoides*,  
407 and *Crassostrea gigas* (Supplementary Figure 10).

#### 408 *Hox gene annotation and genomic comparisons*

409 We located the Hox cluster of *A. granulata* by first creating a BLAST database of the *A. granulata*  
410 scaffolds and then querying this database with available chiton Hox sequences (Wanninger & Wollesen  
411 2019). We marked *A. granulata* sequences with a BLAST hit at e-value 1e-8 as potential Hox sequences.  
412 We found one clear match for each previously identified chiton Hox gene, all in a single cluster within  
413 one scaffold. To verify the absence of *Post1*, we queried the *A. granulata* database with *Post1* sequences  
414 from five other molluscs (Wanninger & Wollesen 2019). All matched with low support to the existing *A.*  
415 *granulata Post2* sequence, so we concluded that *Post1* is absent from the *A. granulata* genome  
416 assembly.

417 To graphically examine synteny between *A. granulata* and other molluscan genome assemblies, we  
418 loaded each assembly and annotation into the online COGE SynMap2 (Haug-Baltzell et al. 2017) server  
419 and compared *A. granulata* to eight other annotated genomes with default SynMap2 settings. We  
420 exported dotplots for each pair of genomes to visualize syntenic regions (or lack thereof). Scaffolds in  
421 each dotplot were sorted by length, but differing assembly qualities made some dotplots difficult to  
422 read due to a high number of very small scaffolds. We assessed heterozygosity of several molluscan  
423 genomes and *A. granulata* by downloading raw paired-end data when possible and using  
424 GenomeScope2 online (Vurture et al. 2017).

425 To permit direct comparisons of repeat content within *A. granulata* and other molluscs, we ran  
426 RepeatModeler (Smit & Hubley 2008-2015) on the scaffolds of a subset of genome assemblies and *A.*  
427 *granulata*. We used the same default parameters for each run and quantified the number of elements in  
428 each repeat family identified by RepeatModeler for each genome assembly we analyzed (LINEs, SINEs,  
429 etc.; Supplementary Table 7).

#### 430 *Orthology inference*

431 To identify orthologous genes shared between *A. granulata* and other molluscs, we used OrthoFinder v.  
432 2.3.7 (Emms & Kelly 2015). We analyzed three separate sets of data: 1) *A. granulata* and genomes of  
433 nineteen other lophotrochozoans, including fourteen other molluscs, two annelids, one brachiopod, one  
434 phoronid, and one nemertean 2) *A. granulata* and a subset of molluscan genomes for detailed  
435 comparisons of biomineralization genes and; 3) *A. granulata* and an expanded set of data including both

436 genomes and transcriptomes, including several transcriptomes from aculiferans other than *A. granulata*.  
437 For all three analyses we used the unclustered 81,691 gene set for *A. granulata*, knowing that duplicated  
438 gene models would cluster together. We removed sequences from our orthogroups that were identical  
439 to longer sequences where they overlapped, as well as fragmented sequences shorter than 100 amino  
440 acids, using uniqHaplo(Anon). We retained orthogroups that had a minimum of four taxa, aligned the  
441 sequences within them with MAFFT (Katoh et al. 2002), and cleaned mistranslated regions with  
442 HmmCleaner (Di Franco et al. 2019). We used AlignmentCompare  
443 ([https://github.com/kmkocot/basal\\_metazoan\\_phylogenomics\\_scripts\\_01-2015](https://github.com/kmkocot/basal_metazoan_phylogenomics_scripts_01-2015)) to delete sequences  
444 that did not overlap with all other sequences by at least 20 AAs (starting with the shortest sequence  
445 meeting this criterion).

#### 446 *Phylogenetic analyses*

447 For species tree reconstruction, in cases where two or more sequences were present for any taxon in a  
448 single-gene alignment, we used PhyloPyPruner 0.9.5 (<https://pypi.org/project/phylopypruner/>) to  
449 reduce the alignment to a set of strict orthologs. This tool uses single-gene trees to screen putative  
450 orthogroups for paralogy. To build single-gene trees based on orthologs, we trimmed alignments with  
451 BMGE v1.12.2 (Criscuolo & Gribaldo 2010) and constructed approximately maximum likelihood trees for  
452 each alignment with FastTree2(Price et al. 2010) using the “slow” and “gamma” options. We then used  
453 these alignments in PhyloPyPruner with the following settings: --min-len 100 --min-support 0.75 --mask  
454 pdist --trim-lb 3 --trim-divergent 0.75 --min-pdist 0.01 --trim-freq-paralogs 3 --prune MI. For datasets 1  
455 (“genomes”) and 3 (“all\_taxa”), only orthogroups sampled for at least 85% of the total number of taxa  
456 were retained for concatenation. For dataset 2 (“biomin\_subset”), only orthogroups sampled for all  
457 eight taxa were retained. Phylogenetic analyses were conducted on the supermatrix produced by  
458 PhyloPyPruner v. 1.0 in IQ-TREE v. 1.6.12 (Nguyen et al. 2015) using the PMSF model (Wang et al. 2018)  
459 with a guide tree based on the LG model. Topological support was assessed with 1,000 rapid bootstraps.

#### 460 *Screening for known biomineralization genes*

461 We identified known molluscan biomineralization genes of interest in the chiton genome by first making  
462 a BLAST protein database of protein sequences for the 81,691-gene model set of *A. granulata*  
463 annotations, translated by Transdecoder (Grabherr et al. 2011; Douglas 2018). We then used the  
464 highest-quality protein sequence of that gene available on NCBI (complete where available, longest if  
465 only incomplete protein sequences existed) as a query for each biomineralization gene of interest with  
466 an initial e-value cutoff of 1e-8. In cases where multiple hits of similar support resulted, we selected the  
467 correct hit by constructing a phylogeny in RAxML v. 8.2.12 (Stamatakis 2014) under the GTRGAMMA  
468 model with rapid bootstrapping and a best-scoring maximum-likelihood tree search in one run, with the  
469 number of bootstrap replicates determined by majority-rule consensus (autoMRE). This produced a list  
470 of sequences from *A. granulata* that matched the biomineralization genes of interest, and allowed us to  
471 narrow down our list of potential biomineralization genes present in *A. granulata*.

472 We used the above set of gene queries from other molluscs to identify the ortholog group from the  
473 above OrthoFinder2 on the subset of genomes selected as biomineralization representatives across  
474 Mollusca. We used the complete CDS or longest mRNA for each gene as a nucleotide query to search  
475 our orthogroups, again with an e-value cutoff of 1e-8 to identify the orthogroup(s) likely contained that



476 particular biomineralization gene of interest. This produced a list of orthogroups that contained  
477 sequences with high similarity to the query, often multiple orthogroups per gene (Supplementary Table  
478 4). This was expected due to clustering within OrthoFinder2. We used NCBI BLAST to verify the identity  
479 of the orthologous gene sequences by verifying that the top hits for each in BLAST matched the  
480 biomineralization gene of interest. We then examined these orthogroups to locate the previously  
481 identified *A. granulata* gene model that matched to each biomineralization protein. The query  
482 sequences for each gene sought in *A. granulata* are available in Supplementary Table 8.

483 Silk-like proteins share similar amino acid composition throughout Metazoa, but the genes that code for  
484 them are difficult to identify in genomes because their highly-repetitive sequences are often missed by  
485 traditional gene annotation tools (McDougall et al. 2016). We looked for silk-like proteins with SilkSlider  
486 (McDougall et al. 2016), run with default settings but using SignalP v. 4.01 (Nielsen 2017), which  
487 identifies potential silk-like proteins by locating low-complexity repetitive domains and signal peptides.  
488 The 31 proteins identified as silk-like by SilkSlider were then uploaded to the SignalP 5.0 webserver  
489 (Almagro Armenteros et al. 2019) for further predictions of signal peptides associated with extracellular  
490 localization.

491 To locate and quantify iron response elements (IREs), we screened the 20,470-gene *A. granulata* gene  
492 model set using the SIREs 2.0 (Campillos et al. 2010) web server. We also ran SIRE on the subset of  
493 genomes used for biomineralization analyses (see OrthoFinder above) for comparison. We compensated  
494 for differences in annotation methods by first clustering all coding sequences from each genome with  
495 CD-Hit-EST (Fu et al. 2012) with a cluster threshold of 0.8 (to match the threshold value we used earlier  
496 to reduce redundancy in the annotations of the *A. granulata* genome). We then ran SIRE on each of  
497 these sets of predicted transcripts. We only accepted predicted IREs scored as “high quality” according  
498 to the SIRE metric (indicating both sequence and structural characteristics of a functional IRE). We  
499 pulled chiton genes containing a high quality IRE from the eight different tissue transcriptomes  
500 generated for genome annotation and assessed expression by mapping each back to the genome with  
501 Salmon v. 0.11.3 (Patro et al. 2017-4) to generate quantifications of reads per transcript, and running  
502 these quantifications through edgeR (Robinson et al. 2010) to account for transcript length (TPM) and  
503 permit direct comparisons of gene expression. We also separated 3’ and 5’ IREs by subsetting the high  
504 quality IREs based on whether the IRE was located at the beginning or end of the sequence. We made  
505 heatmaps with log-transformed data to compensate for outliers in expression levels with R package  
506 prettyheatmap (Kolde 2012). We then analyzed the GO terms enriched in the separate sets of 5’- and 3’-  
507 containing genes that were highly expressed in the radula with GOrilla (Eden et al. 2009), using the  
508 complete protein set as a background dataset and the sets of IRE-containing genes as the target list.

## 509 **Supplementary Material**

510 The West Indian Fuzzy Chiton *Acanthopleura granulata* genome and transcriptomes from the same  
511 individuals have been deposited in the NCBI database as BioProject PRJNA578131. The genome project  
512 is registered in NCBI as JABBOT000000000. All raw reads for both the genome and transcriptomes are  
513 available online at the NCBI Sequence Read Archive under the same BioProject PRJNA578131.  
514 Transcriptome data of other species of chitons used for genome annotation are available online at the  
515 NCBI Sequence Read Archive under BioProjects PRJNA626693 and PRJNA629039. The genome assembly,  
516 all sets of gene models discussed in the manuscript, functional annotations, and supporting

517 documentation for the biomineralization genes described are available in Dryad with the identifier doi:X  
518 [For the purposes of peer review, data are currently available via Box:  
519 <https://alabama.box.com/s/1hsryfff61i01qrljyasrjnu8i7qg2nj>]. All code used in this study is available in  
520 Supplementary Material, Appendix 1.

## 521 **Acknowledgements**

522 We thank Ken Halanych and the crew and scientists of the Icy Inverts cruises aboard R/V Lawrence M.  
523 Gould and R/V Nathaniel B. Palmer for collecting *Callochiton* sp., Christoph Held, the Alfred Wegener  
524 Institute, and the scientists and crew of the PS96 cruise aboard R/V Polarstern for facilitating collection  
525 of *Nuttallochiton* sp., Julia Sigwart and Lauren Sumner-Rooney for collecting *Leptochiton asellus*, and  
526 Alexandra Kingston and Daniel Chappell for collecting *Chiton marmoratus* and *Chiton tuberculatus*, all  
527 used for transcriptome sequencing. CM was supported by a Malacological Society of London grant for  
528 transcriptome sequencing of *Acanthopleura gemmata*. We thank Kerry Roper for RNA QC of the  
529 *Acanthopleura gemmata* transcriptome samples. We thank the staff of the Smithsonian Marine Station  
530 at Ft. Pierce and the Keys Marine Lab for providing housing during collections. RMV thanks John Sutton,  
531 Michael McKain, and Michelle Lewis for assistance in optimizing nanopore library preparation protocols.

532 **REFERENCES**

- 533 Adema CM et al. 2017. Whole genome analysis of a schistosomiasis-transmitting freshwater snail. *Nat.*  
534 *Commun.* 8. doi: 10.1038/ncomms15451.
- 535 Albertin CB et al. 2015. The octopus genome and the evolution of cephalopod neural and morphological  
536 novelties. *Nature.* 524:220–224. doi: 10.1038/nature14668.
- 537 Almagro Armenteros JJ et al. 2019. SignalP 5.0 improves signal peptide predictions using deep neural  
538 networks. *Nat. Biotechnol.* 37:420–423. doi: 10.1038/s41587-019-0036-z.
- 539 Bai C-M et al. 2019. Chromosomal-level assembly of the blood clam, *Scapharca (Anadara) broughtonii*,  
540 using long sequence reads and Hi-C. *Gigascience.* 8. doi: 10.1093/gigascience/giz067.
- 541 Barghi N, Concepcion GP, Olivera BM, Lluisma AO. 2016. Structural features of conopeptide genes  
542 inferred from partial sequences of the *Conus tribblei* genome. *Mol. Genet. Genomics.* 291:411–422. doi:  
543 10.1007/s00438-015-1119-2.
- 544 Barucca M, Canapa A, Biscotti MA. 2016. An Overview of Hox Genes in Lophotrochozoa: Evolution and  
545 Functionality. *Journal of Developmental Biology.* 4:12. doi: 10.3390/jdb4010012.
- 546 Belcaid M et al. 2019. Symbiotic organs shaped by distinct modes of genome evolution in cephalopods.  
547 *Proc. Natl. Acad. Sci. U. S. A.* 201817322. doi: 10.1073/pnas.1817322116.
- 548 Blaxter M, Challis R. 2018. BlobToolkit. BlobToolKit. <https://github.com/blobtoolkit>.
- 549 Cai H et al. 2019. A draft genome assembly of the solar-powered sea slug *Elysia chlorotica*. *Scientific*  
550 *Data.* 6:190022. doi: 10.1038/sdata.2019.22.
- 551 Calcino AD et al. 2018. The quagga mussel genome and the evolution of freshwater tolerance:  
552 Supplementary Material. *bioRxiv.* doi: 10.1101/505305.
- 553 Campillos M, Cases I, Hentze MW, Sanchez M. 2010. SIREs: searching for iron-responsive elements.  
554 *Nucleic Acids Res.* 38:W360–W367. doi: 10.1093/nar/gkq371.
- 555 Cantarel BL et al. 2008-1. MAKER: An easy-to-use annotation pipeline designed for emerging model  
556 organism genomes. *Genome Res.* 18:188–196. doi: 10.1101/gr.6743907.
- 557 Checa AG, Vendrasco MJ, Salas C. 2017. Cuticle of Polyplacophora: structure, secretion, and homology  
558 with the periostracum of conchiferans. *Mar. Biol.* 164:64. doi: 10.1007/s00227-017-3100-6.
- 559 Cölfen H. 2010. A crystal-clear view. *Nat. Mater.* 9:960–961. doi: 10.1038/nmat2911.
- 560 Collett LC, O’Gower AK. 1972. Molluscan hemoglobins with unusual temperature-dependent  
561 characteristics. *Comp. Biochem. Physiol. A Comp. Physiol.* 41:843–850. doi: 10.1016/0300-  
562 9629(72)90346-5.
- 563 Criscuolo A, Gribaldo S. 2010. BMGE (Block Mapping and Gathering with Entropy): a new software for  
564 selection of phylogenetic informative regions from multiple sequence alignments. *BMC Evol. Biol.*  
565 10:210. doi: 10.1186/1471-2148-10-210.

- 566 Davison A et al. 2016. Formin Is Associated with Left-Right Asymmetry in the Pond Snail and the Frog.  
567 *Curr. Biol.* 26:654–660. doi: 10.1016/j.cub.2015.12.071.
- 568 Di Franco A, Poujol R, Baurain D, Philippe H. 2019. Evaluating the usefulness of alignment filtering  
569 methods to reduce the impact of errors on evolutionary inferences. *BMC Evol. Biol.* 19:21. doi:  
570 10.1186/s12862-019-1350-2.
- 571 Dixon SJ, Stockwell BR. 2014. The role of iron and reactive oxygen species in cell death. *Nat. Chem. Biol.*  
572 10:9–17. doi: 10.1038/nchembio.1416.
- 573 Douglas P. 2018. TransDecoder/TransDecoder. GitHub. <https://github.com/TransDecoder/TransDecoder>  
574 (Accessed March 23, 2020).
- 575 Du X et al. 08 01, 2017. The pearl oyster *Pinctada fucata martensii* genome and multi-omic analyses  
576 provide insights into biomineralization. *Gigascience.* 6:1–12. doi: 10.1093/gigascience/gix059.
- 577 Eden E, Navon R, Steinfeld I, Lipson D, Yakhini Z. 2009. GOrilla: a tool for discovery and visualization of  
578 enriched GO terms in ranked gene lists. *BMC Bioinformatics.* 10:48. doi: 10.1186/1471-2105-10-48.
- 579 Eisoldt L, Smith A, Scheibel T. 2011. Decoding the secrets of spider silk. *Mater. Today.* 14:80–86. doi:  
580 10.1016/S1369-7021(11)70057-8.
- 581 Emms DM, Kelly S. 2015. OrthoFinder: solving fundamental biases in whole genome comparisons  
582 dramatically improves orthogroup inference accuracy. *Genome Biol.* 16:157. doi: 10.1186/s13059-015-  
583 0721-2.
- 584 Fröblius AC, Matus DQ, Seaver EC. 2008. Genomic Organization and Expression Demonstrate Spatial and  
585 Temporal Hox Gene Colinearity in the Lophotrochozoan *Capitella* sp. I. *PLoS One.* 3. doi:  
586 10.1371/journal.pone.0004004.
- 587 Fu L, Niu B, Zhu Z, Wu S, Li W. 2012. CD-HIT: accelerated for clustering the next-generation sequencing  
588 data. *Bioinformatics.* 28:3150–3152. doi: 10.1093/bioinformatics/bts565.
- 589 Furuhashi T, Schwarzingler C, Miksik I, Smrz M, Beran A. 2009. Molluscan shell evolution with review of  
590 shell calcification hypothesis. *Comp. Biochem. Physiol. B Biochem. Mol. Biol.* 154:351–371. doi:  
591 10.1016/j.cbpb.2009.07.011.
- 592 Gaume B et al. 2014. Characterisation and expression of the biomineralising gene *Lustrin A* during shell  
593 formation of the European abalone *Haliotis tuberculata*. *Comp. Biochem. Physiol. B Biochem. Mol. Biol.*  
594 169:1–8. doi: 10.1016/j.cbpb.2013.11.010.
- 595 Gerdol M, Luo Y-J, Satoh N, Pallavicini A. 05 2018. Genetic and molecular basis of the immune system in  
596 the brachiopod *Lingula anatina*. *Dev. Comp. Immunol.* 82:7–30. doi: 10.1016/j.dci.2017.12.021.
- 597 Giribet G, Edgecombe GD. 2020. Mollusca. In: *The Invertebrate Tree of Life*. Princeton University Press  
598 pp. 358–390. <https://books.google.com/books?id=anetDwAAQBAJ>.
- 599 Glynn P. 1970. On the Ecology of the Caribbean Chitons *Acanthopleura granulata* Gmelin and *Chiton*  
600 *tuberculatus* Linee: Density, Mortality, Feeding, Reproduction, and Growth. *Smithson. Contrib. Zool.*

- 601 Gómez-Chiarri M, Warren WC, Guo X, Proestou D. 2015. Developing tools for the study of molluscan  
602 immunity: The sequencing of the genome of the eastern oyster, *Crassostrea virginica*. *Fish Shellfish*  
603 *Immunol.* 46:2–4. doi: 10.1016/j.fsi.2015.05.004.
- 604 Grabherr MG et al. 2011. Trinity: reconstructing a full-length transcriptome without a genome from  
605 RNA-Seq data. *Nat. Biotechnol.* 29:644–652. doi: 10.1038/nbt.1883.
- 606 Gurevich A, Saveliev V, Vyahhi N, Tesler G. 2013. QUAST: quality assessment tool for genome  
607 assemblies. *Bioinformatics.* 29:1072–1075. doi: 10.1093/bioinformatics/btt086.
- 608 Haas BJ et al. 2003. Improving the Arabidopsis genome annotation using maximal transcript alignment  
609 assemblies. *Nucleic Acids Res.* 31:5654–5666. doi: 10.1093/nar/gkg770.
- 610 Haug-Baltzell A, Stephens SA, Davey S, Scheidegger CE, Lyons E. 2017. SynMap2 and SynMap3D: web-  
611 based whole-genome synteny browsers. *Bioinformatics.* 33:2197–2198. doi:  
612 10.1093/bioinformatics/btx144.
- 613 Huan P, Wang Q, Tan S, Liu B. 2019. Dorsoventral dissociation of Hox gene expression underpins the  
614 diversification of molluscs. *bioRxiv.* 603092. doi: 10.1101/603092.
- 615 Hunt M et al. 2013. REAPR: a universal tool for genome assembly evaluation. *Genome Biol.* 14:R47. doi:  
616 10.1186/gb-2013-14-5-r47.
- 617 Iijima M, Akiba N, Sarashina I, Kuratani S, Endo K. 2006. Evolution of Hox genes in molluscs: a  
618 comparison among seven morphologically diverse classes. *J. Molluscan Stud.* 72:259–266. doi:  
619 10.1093/mollus/eyl001.
- 620 Irisarri I, Uribe JE, Eernisse DJ, Zardoya R. 2020. A mitogenomic phylogeny of chitons (Mollusca:  
621 Polyplacophora). *BMC Evol. Biol.* 20:22. doi: 10.1186/s12862-019-1573-2.
- 622 Ishikawa A et al. 2020. Functional shell matrix proteins tentatively identified by asymmetric snail shell  
623 morphology. *Sci. Rep.* 10:9768. doi: 10.1038/s41598-020-66021-w.
- 624 Jackson DJ et al. 2006. A rapidly evolving secretome builds and patterns a sea shell. *BMC Biol.* 4:40. doi:  
625 10.1186/1741-7007-4-40.
- 626 Joester D, Brooker LR. 2016. The Chiton *Radula*: A Model System for Versatile Use of Iron Oxides. *Iron*  
627 *Oxides: From Nature to Applications.* 177–205. doi: 10.1002/9783527691395.ch8.
- 628 Katoh K, Misawa K, Kuma K-I, Miyata T. 2002. MAFFT: a novel method for rapid multiple sequence  
629 alignment based on fast Fourier transform. *Nucleic Acids Res.* 30:3059–3066.  
630 <https://www.ncbi.nlm.nih.gov/pmc/articles/PMC135756/> (Accessed February 22, 2019).
- 631 Kawamoto N. 1928. Oxygen capacity of the blood of certain invertebrates which contains hemoglobin.  
632 *Sci. Rep. Tohoku Univ.* . 3:561–575.
- 633 Kenny NJ, Namigai EKO, Marlétaz F, Hui JHL, Shimeld SM. 2015. Draft genome assemblies and predicted  
634 microRNA complements of the intertidal lophotrochozoans *Patella vulgata* (Mollusca,  
635 *Patellogastropoda*) and *Spirobranchus (Pomatoceros) lamarcki* (Annelida, *Serpulida*). *Mar. Genomics.* 24  
636 Pt 2:139–146. doi: 10.1016/j.margen.2015.07.004.

- 637 Kijas J et al. 2019. Genome Sequencing of Blacklip and Greenlip Abalone for Development and Validation  
638 of a SNP Based Genotyping Tool. *Front. Genet.* 9. doi: 10.3389/fgene.2018.00687.
- 639 Kim K-S, Burford MA, Macey DJ, Webb J. 1988. Iron concentrations and characterisation of the major  
640 iron binding proteins in the tissues of the chiton *Clavari zona hirtosa*. *Comparative Biochemistry and*  
641 *Physiology Part B: Comparative Biochemistry.* 91:159–164. doi: 10.1016/0305-0491(88)90129-0.
- 642 Kim K-S, Macey DJ, Webb J, Mann S. 1989. Iron Mineralization in the Radula Teeth of the Chiton  
643 *Acanthopleura hirtosa*. *Proceedings of the Royal Society of London B: Biological Sciences.* 237:335–346.  
644 doi: 10.1098/rspb.1989.0052.
- 645 Kocot KM et al. 2011. Phylogenomics reveals deep molluscan relationships. *Nature.* 477:452. doi:  
646 10.1038/nature10382.
- 647 Kocot KM. 01/2013. Recent advances and unanswered questions in deep molluscan phylogenetics \*. *Am.*  
648 *Malacol. Bull.* 31:195–208. doi: 10.4003/006.031.0112.
- 649 Kocot KM, Aguilera F, McDougall C, Jackson DJ, Degnan BM. 2016. Sea shell diversity and rapidly  
650 evolving secretomes: insights into the evolution of biomineralization. *Front. Zool.* 13:23. doi:  
651 10.1186/s12983-016-0155-z.
- 652 Kocot KM, Poustka AJ, Stöger I, Halanych KM, Schrödl M. 2020. New data from Monoplacophora and a  
653 carefully-curated dataset resolve molluscan relationships. *Sci. Rep.* 10:1–8. doi: 10.1038/s41598-019-  
654 56728-w.
- 655 Kolde R. 2012. *Pheatmap: pretty heatmaps*. [https://cran.r-](https://cran.r-project.org/web/packages/pheatmap/pheatmap.pdf)  
656 [project.org/web/packages/pheatmap/pheatmap.pdf](https://cran.r-project.org/web/packages/pheatmap/pheatmap.pdf).
- 657 Langmead B, Salzberg SL. 2012. Fast gapped-read alignment with Bowtie 2. *Nat. Methods.* 9:357–359.  
658 doi: 10.1038/nmeth.1923.
- 659 Lee PN, Callaerts P, De Couet HG, Martindale MQ. 2003. Cephalopod Hox genes and the origin of  
660 morphological novelties. *Nature.* 424:1061–1065. doi: 10.1038/nature01872.
- 661 Lewis RV. 2006. Spider Silk: Ancient Ideas for New Biomaterials. *Chem. Rev.* 106:3762–3774. doi:  
662 10.1021/cr010194g.
- 663 Li C et al. 04 01, 2018. Draft genome of the Peruvian scallop *Argopecten purpuratus*. *Gigascience.* 7. doi:  
664 10.1093/gigascience/giy031.
- 665 Li L et al. 2015. Multifunctionality of chiton biomineralized armor with an integrated visual system.  
666 *Science.* 350:952–956. doi: 10.1126/science.aad1246.
- 667 Liu C et al. 2018. The genome of the golden apple snail *Pomacea canaliculata* provides insight into stress  
668 tolerance and invasive adaptation. *Gigascience.* 7. doi: 10.1093/gigascience/giy101.
- 669 Lowenstam HA. 1962. Magnetite in Denticle Capping in Recent Chitons (Polyplacophora). *Geol. Soc. Am.*  
670 *Bull.* 73:435–438. doi: 10.1130/0016-7606(1962)73[435:MIDCIR]2.0.CO;2.
- 671 Manwell C. 1963. The chemistry and biology of hemoglobin in some marine clams—I. Distribution of the



- 672 pigment and properties of the oxygen equilibrium. *Comp. Biochem. Physiol.* 8:209–218. doi:  
673 10.1016/0010-406X(63)90125-7.
- 674 Masonbrink RE et al. 2019. An annotated genome for *Haliotis rufescens* (red abalone) and resequenced  
675 green, pink, pinto, black, and white abalone species. *Genome Biol. Evol.* 11:431–438. doi:  
676 10.1093/gbe/evz006.
- 677 McCartney MA et al. 2019. The genome of the zebra mussel, *Dreissena polymorpha*: a resource for  
678 invasive species research. *bioRxiv.* 696732. doi: 10.1101/696732.
- 679 McDougall C, Degnan BM. 2018. The evolution of mollusc shells. *Wiley Interdiscip. Rev. Dev. Biol.*  
680 0:e313. doi: 10.1002/wdev.313.
- 681 McDougall C, Woodcroft BJ, Degnan BM. 2016. The Widespread Prevalence and Functional Significance  
682 of Silk-Like Structural Proteins in Metazoan Biological Materials De Brevern, AG, editor. *PLoS One.*  
683 11:e0159128. doi: 10.1371/journal.pone.0159128.
- 684 Modica MV, Lombardo F, Franchini P, Oliverio M. 2015. The venomous cocktail of the vampire snail  
685 *Colubraria reticulata* (Mollusca, Gastropoda). *BMC Genomics.* 16:441. doi: 10.1186/s12864-015-1648-4.
- 686 Moriya Y, Itoh M, Okuda S, Yoshizawa AC, Kanehisa M. 2007. KAAS: an automatic genome annotation  
687 and pathway reconstruction server. *Nucleic Acids Res.* 35:W182–5. doi: 10.1093/nar/gkm321.
- 688 Murgarella M et al. 2016. A First Insight into the Genome of the Filter-Feeder Mussel *Mytilus*  
689 *galloprovincialis*. *PLoS One.* 11. doi: 10.1371/journal.pone.0151561.
- 690 Nam B-H et al. 05 01, 2017. Genome sequence of pacific abalone (*Haliotis discus hannai*): the first draft  
691 genome in family Haliotidae. *Gigascience.* 6:1–8. doi: 10.1093/gigascience/gix014.
- 692 Nemoto M et al. 2019. Integrated transcriptomic and proteomic analyses of a molecular mechanism of  
693 radular teeth biomineralization in *Cryptochiton stelleri*. *Sci. Rep.* 9:856. doi: 10.1038/s41598-018-37839-  
694 2.
- 695 Nguyen L-T, Schmidt HA, von Haeseler A, Minh BQ. 2015. IQ-TREE: A Fast and Effective Stochastic  
696 Algorithm for Estimating Maximum-Likelihood Phylogenies. *Mol. Biol. Evol.* 32:268–274. doi:  
697 10.1093/molbev/msu300.
- 698 Nielsen H. 2017. Predicting Secretory Proteins with SignalP. In: *Protein Function Prediction: Methods*  
699 *and Protocols.* Kihara, D, editor. *Methods in Molecular Biology* Springer: New York, NY pp. 59–73. doi:  
700 10.1007/978-1-4939-7015-5\_6.
- 701 Patel SV. 2004. A Novel Function of Invertebrate Collagen in the Biomineralization Process During the  
702 Shell Repair of Eastern Oyster, *Crassostrea virginica*. *Clemson University*  
703 <https://books.google.com/books?id=1Ew2twAACAAJ>.
- 704 Patro R, Duggal G, Love MI, Irizarry RA, Kingsford C. 2017-4. Salmon: fast and bias-aware quantification  
705 of transcript expression using dual-phase inference. *Nat. Methods.* 14:417–419. doi:  
706 10.1038/nmeth.4197.
- 707 Piccinelli P, Samuelsson T. 2007-7. Evolution of the iron-responsive element. *RNA.* 13:952–966. doi:

- 708 10.1261/rna.464807.
- 709 Powell D et al. 2018. The genome of the oyster *Saccostrea* offers insight into the environmental  
710 resilience of bivalves. *DNA Res.* 25:655–665. doi: 10.1093/dnares/dsy032.
- 711 Price MN, Dehal PS, Arkin AP. 2010. FastTree 2 – Approximately Maximum-Likelihood Trees for Large  
712 Alignments. *PLoS One.* 5:e9490. doi: 10.1371/journal.pone.0009490.
- 713 Prysycz LP, Gabaldón T. 07 08, 2016. Redundans: an assembly pipeline for highly heterozygous genomes.  
714 *Nucleic Acids Res.* 44:e113. doi: 10.1093/nar/gkw294.
- 715 Quinlan AR, Hall IM. 2010. BEDTools: a flexible suite of utilities for comparing genomic features.  
716 *Bioinformatics.* 26:841–842. doi: 10.1093/bioinformatics/btq033.
- 717 Read KRH. 1966. Molluscan hemoglobin and myoglobin. In ‘Physiology of Mollusca’ (KM Wilbur and CM  
718 Yonge, eds.), Vol. 2.
- 719 Renaut S et al. 07 01, 2018. Genome Survey of the Freshwater Mussel *Venustaconcha ellipsiformis*  
720 (*Bivalvia*: Unionida) Using a Hybrid De Novo Assembly Approach. *Genome Biol. Evol.* 10:1637–1646. doi:  
721 10.1093/gbe/evy117.
- 722 Robinson MD, McCarthy DJ, Smyth GK. 2010. edgeR: a Bioconductor package for differential expression  
723 analysis of digital gene expression data. *Bioinformatics.* 26:139–140. doi:  
724 10.1093/bioinformatics/btp616.
- 725 Roebuck K. 2017. Nuclear Genome Size Diversity Of Marine Invertebrate Taxa Using Flow Cytometric  
726 Analysis. <https://api.semanticscholar.org/b7c1cd8822ff2c02c54e2654469ea4d1278a71e9>.
- 727 Rogers J, Munro H. 1987. Translation of ferritin light and heavy subunit mRNAs is regulated by  
728 intracellular chelatable iron levels in rat hepatoma cells. *Proceedings of the National Academy of*  
729 *Sciences.* 84:2277–2281. doi: 10.1073/pnas.84.8.2277.
- 730 Schell T et al. 2017. An Annotated Draft Genome for *Radix auricularia* (Gastropoda, Mollusca). *Genome*  
731 *Biol. Evol.* 9:0. doi: 10.1093/gbe/evx032.
- 732 Scherholz M, Redl E, Wollesen T, Todt C, Wanninger A. 2013. Aplacophoran Mollusks Evolved from  
733 Ancestors with Polyplacophoran-like Features. *Curr. Biol.* 23:2130–2134. doi:  
734 10.1016/j.cub.2013.08.056.
- 735 Schiemann SM et al. 2017. Clustered brachiopod Hox genes are not expressed collinearly and are  
736 associated with lophotrochozoan novelties. *Proc. Natl. Acad. Sci. U. S. A.* 114:E1913–E1922. doi:  
737 10.1073/pnas.1614501114.
- 738 Schwabe E. 2010. Illustrated summary of chiton terminology. *Spixiana.* 33:171–194.
- 739 Shaw JA, Brooker LR, Macey DJ. 2002. Radula tooth turnover in the chiton, *Acanthopleura hirtosa*  
740 (Blainville, 1825) (Mollusca : Polyplacophora). *Molluscan Res.* 22:93–99. doi: 10.1071/mr02005.
- 741 Shaw JA, Macey DJ, Brooker LR, Clode PL. 2010. Tooth Use and Wear in Three Iron-Biomineralizing  
742 Mollusc Species. *Biol. Bull.* 218:132–144. doi: 10.1086/BBLv218n2p132.

- 743 Sigwart JD, Sutton MD. 2007. Deep molluscan phylogeny: synthesis of palaeontological and  
744 neontological data. *Proceedings of the Royal Society of London B: Biological Sciences*. 274:2413–2419.  
745 doi: 10.1098/rspb.2007.0701.
- 746 Sigwart JD, Todt C, Scheltema AH. 2014. Who are the ‘Aculifera’? *J. Nat. Hist.* 48:2733–2737. doi:  
747 10.1080/00222933.2014.964788.
- 748 Simakov O et al. 2013. Insights into bilaterian evolution from three spiralian genomes. *Nature*. 493:526–  
749 531. doi: 10.1038/nature11696.
- 750 Simão FA, Waterhouse RM, Ioannidis P, Kriventseva EV, Zdobnov EM. 2015. BUSCO: assessing genome  
751 assembly and annotation completeness with single-copy orthologs. *Bioinformatics*. 31:3210–3212. doi:  
752 10.1093/bioinformatics/btv351.
- 753 Smit AFA, Hubley R. 2008–2015. RepeatModeler Open-1.0. <http://www.repeatmasker.org>.
- 754 Smith SA et al. 2011. Resolving the evolutionary relationships of molluscs with phylogenomic tools.  
755 *Nature*. 480:364–367. doi: 10.1038/nature10526.
- 756 Solé-Cava AM, Thorpe JP. 1991. High levels of genetic variation in natural populations of marine lower  
757 invertebrates. *Biol. J. Linn. Soc. Lond.* 44:65–80. doi: 10.1111/j.1095-8312.1991.tb00607.x.
- 758 Speiser DI, Eernisse DJ, Johnsen S. 2011. A Chiton Uses Aragonite Lenses to Form Images. *Curr. Biol.*  
759 21:665–670. doi: 10.1016/j.cub.2011.03.033.
- 760 Stamatakis A. 2014. RAxML version 8: a tool for phylogenetic analysis and post-analysis of large  
761 phylogenies. *Bioinformatics*. 30:1312–1313. doi: 10.1093/bioinformatics/btu033.
- 762 Stanke M et al. 2006. AUGUSTUS: ab initio prediction of alternative transcripts. *Nucleic Acids Res.*  
763 34:W435–W439. doi: 10.1093/nar/gkl200.
- 764 Sun J et al. 2017. Adaptation to deep-sea chemosynthetic environments as revealed by mussel genomes.  
765 *Nat Ecol Evol.* 1:1–7. doi: 10.1038/s41559-017-0121.
- 766 Sun J et al. 2020. The Scaly-foot Snail genome and implications for the origins of biomineralised armour.  
767 *Nat. Commun.* 11:1–12. doi: 10.1038/s41467-020-15522-3.
- 768 Suzuki M et al. 2009. An acidic matrix protein, Pif, is a key macromolecule for nacre formation. *Science*.  
769 325:1388–1390. doi: 10.1126/science.1173793.
- 770 Suzuki M, Iwashima A, Kimura M, Kogure T, Nagasawa H. 2013. The molecular evolution of the pif family  
771 proteins in various species of mollusks. *Mar. Biotechnol.* 15:145–158. doi: 10.1007/s10126-012-9471-2.
- 772 Takeuchi T et al. 2012. Draft genome of the pearl oyster *Pinctada fucata*: a platform for understanding  
773 bivalve biology. *DNA Res.* 19:117–130. doi: 10.1093/dnares/dss005.
- 774 Thai BT et al. 2019. Whole Genome Assembly of the Snout Otter Clam, *Lutraria rhynchaena*, Using  
775 Nanopore and Illumina Data, Benchmarked Against Bivalve Genome Assemblies. *Front. Genet.* 10. doi:  
776 10.3389/fgene.2019.01158.
- 777 Thomson AM, Rogers JT, Leedman PJ. 1999. Iron-regulatory proteins, iron-responsive elements and

- 778 ferritin mRNA translation. *Int. J. Biochem. Cell Biol.* 31:1139–1152. doi: 10.1016/S1357-2725(99)00080-  
779 1.
- 780 Vinther J, Parry L, Briggs DEG, Van Roy P. 2017. Ancestral morphology of crown-group molluscs revealed  
781 by a new Ordovician stem aculiferan. *Nature.* 542:471–474. doi: 10.1038/nature21055.
- 782 Vinther J, Sperling EA, Briggs DEG, Peterson KJ. 2012. A molecular palaeobiological hypothesis for the  
783 origin of aplacophoran molluscs and their derivation from chiton-like ancestors. *Proc. R. Soc. B.*  
784 279:1259–1268. doi: 10.1098/rspb.2011.1773.
- 785 Vurture GW et al. 2017. GenomeScope: fast reference-free genome profiling from short reads.  
786 *Bioinformatics.* 33:2202–2204. doi: 10.1093/bioinformatics/btx153.
- 787 Wang H-C, Minh BQ, Susko E, Roger AJ. 2018. Modeling Site Heterogeneity with Posterior Mean Site  
788 Frequency Profiles Accelerates Accurate Phylogenomic Estimation. *Syst. Biol.* 67:216–235. doi:  
789 10.1093/sysbio/syx068.
- 790 Wang S et al. 2017. Scallop genome provides insights into evolution of bilaterian karyotype and  
791 development. *Nat Ecol Evol.* 1:1–12. doi: 10.1038/s41559-017-0120.
- 792 Wanninger A, Wollesen T. 2019. The evolution of molluscs. *Biol. Rev. Camb. Philos. Soc.* 94:102–115.  
793 doi: 10.1111/brv.12439.
- 794 Weckselblatt B, Rudd MK. 2015. Human structural variation: mechanisms of chromosome  
795 rearrangements. *Trends Genet.* 31:587–599. doi: 10.1016/j.tig.2015.05.010.
- 796 Wick RR. 2018. *Porechop*. <https://github.com/rrwick/Porechop>.
- 797 Wollesen T et al. 2017. Brain regionalization genes are co-opted into shell field patterning in Mollusca.  
798 *Sci. Rep.* 7. doi: 10.1038/s41598-017-05605-5.
- 799 Xu L et al. 2019. OrthoVenn2: a web server for whole-genome comparison and annotation of  
800 orthologous clusters across multiple species. *Nucleic Acids Res.* 47:W52–W58. doi: 10.1093/nar/gkz333.
- 801 Xu Z et al. 2016. Formation of hierarchical bone-like apatites on silk microfiber templates via  
802 biomineralization. *RSC Adv.* 6:76426–76433. doi: 10.1039/C6RA17199K.
- 803 Zarrella I et al. 2019. The survey and reference assisted assembly of the *Octopus vulgaris* genome. *Sci*  
804 *Data.* 6. doi: 10.1038/s41597-019-0017-6.
- 805 Zhang G et al. 2012. The oyster genome reveals stress adaptation and complexity of shell formation.  
806 *Nature.* 490:49–54. doi: 10.1038/nature11413.
- 807 Zimin AV et al. 2013. The MaSuRCA genome assembler. *Bioinformatics.* 29:2669–2677. doi:  
808 10.1093/bioinformatics/btt476.
- 809

810 **FIGURE LEGENDS:**

811 **Figure 1:** (a) The West Indian Fuzzy Chiton *Acanthopleura granulata*. Photograph by David Liittschwager.  
812 (b) A single shell plate from *A. granulata*. Scale bar indicates 5mm. (c) The eyes (white arrow) and  
813 aesthetes (black arrow) of *A. granulata*. Scale bar indicates 200  $\mu$ M. Photograph by David Liittschwager.  
814 (d) Teeth from the anterior-most region of the radula of *A. granulata*. The larger teeth, used for feeding,  
815 are mineralized with iron oxide (orange) and capped with magnetite (black). Scale bar indicates 300  $\mu$ M  
816 (e) A genome-based phylogeny of Mollusca showing chitons as sister to all other molluscs with available  
817 genomes.

818 **Figure 2:** Synteny of Hox genes between *A. granulata* and other taxa. The presence of a gene is indicated  
819 by a box of the corresponding color. Continuous black lines indicate that the species has an available  
820 genome and Hox genes were located on a contiguous scaffold. Broken black lines indicate that gene(s)  
821 are located on multiple genomic scaffolds. A double slash indicates genes are located on a single  
822 contiguous scaffold but separated by greater distances than those in most other taxa.

823 **Figure 3:** Iron response elements (IREs) in the *A. granulata* genome. (a) The number of IREs in several  
824 molluscan gene model sets, and relative proportions of 5' and 3' IREs. *A. granulata* has more IREs than  
825 all other molluscs examined, but the relative proportion of 5' and 3' IREs appears consistent across  
826 molluscan genomes. (b) The relative expression [ $\log_{10}(\text{TPM})$ ] of transcripts containing IREs in the  
827 different tissues of *A. granulata*. The radula is divided into four developmentally distinct regions: R1, the  
828 most anterior region, contains teeth used for feeding; R2 contains teeth that are developed but are not  
829 yet used for feeding; R3 contains developing teeth that contain iron oxide; and R4, the most posterior  
830 region, contains developing teeth that have yet to be coated with iron. We found lower expression of  
831 most IRE-containing genes in the anterior regions of the radula. (LogTPM used to allow both data ranges  
832 to appear legibly on the same graph)

833 **Figure 4:** The two isoforms of heavy-chain ferritin recovered in *A. granulata*. (a) The locations of the  
834 transcription initiation sites and exons of isoform 1 of ferritin (orange, above) and isoform 2 of ferritin  
835 (blue, below). A 5' IRE (red) is present in the 5' untranslated region of isoform 1, but not in isoform 2. (b)  
836 Relative expression of both isoforms of ferritin across *A. granulata* tissues. The radula is divided into four  
837 developmentally distinct regions as in Figure 3. Isoform 1 is transcribed more highly throughout the  
838 body than isoform 2. Isoform 2 is transcribed at lower levels in the anterior (iron-rich) regions of the  
839 radula than in other tissues.

840



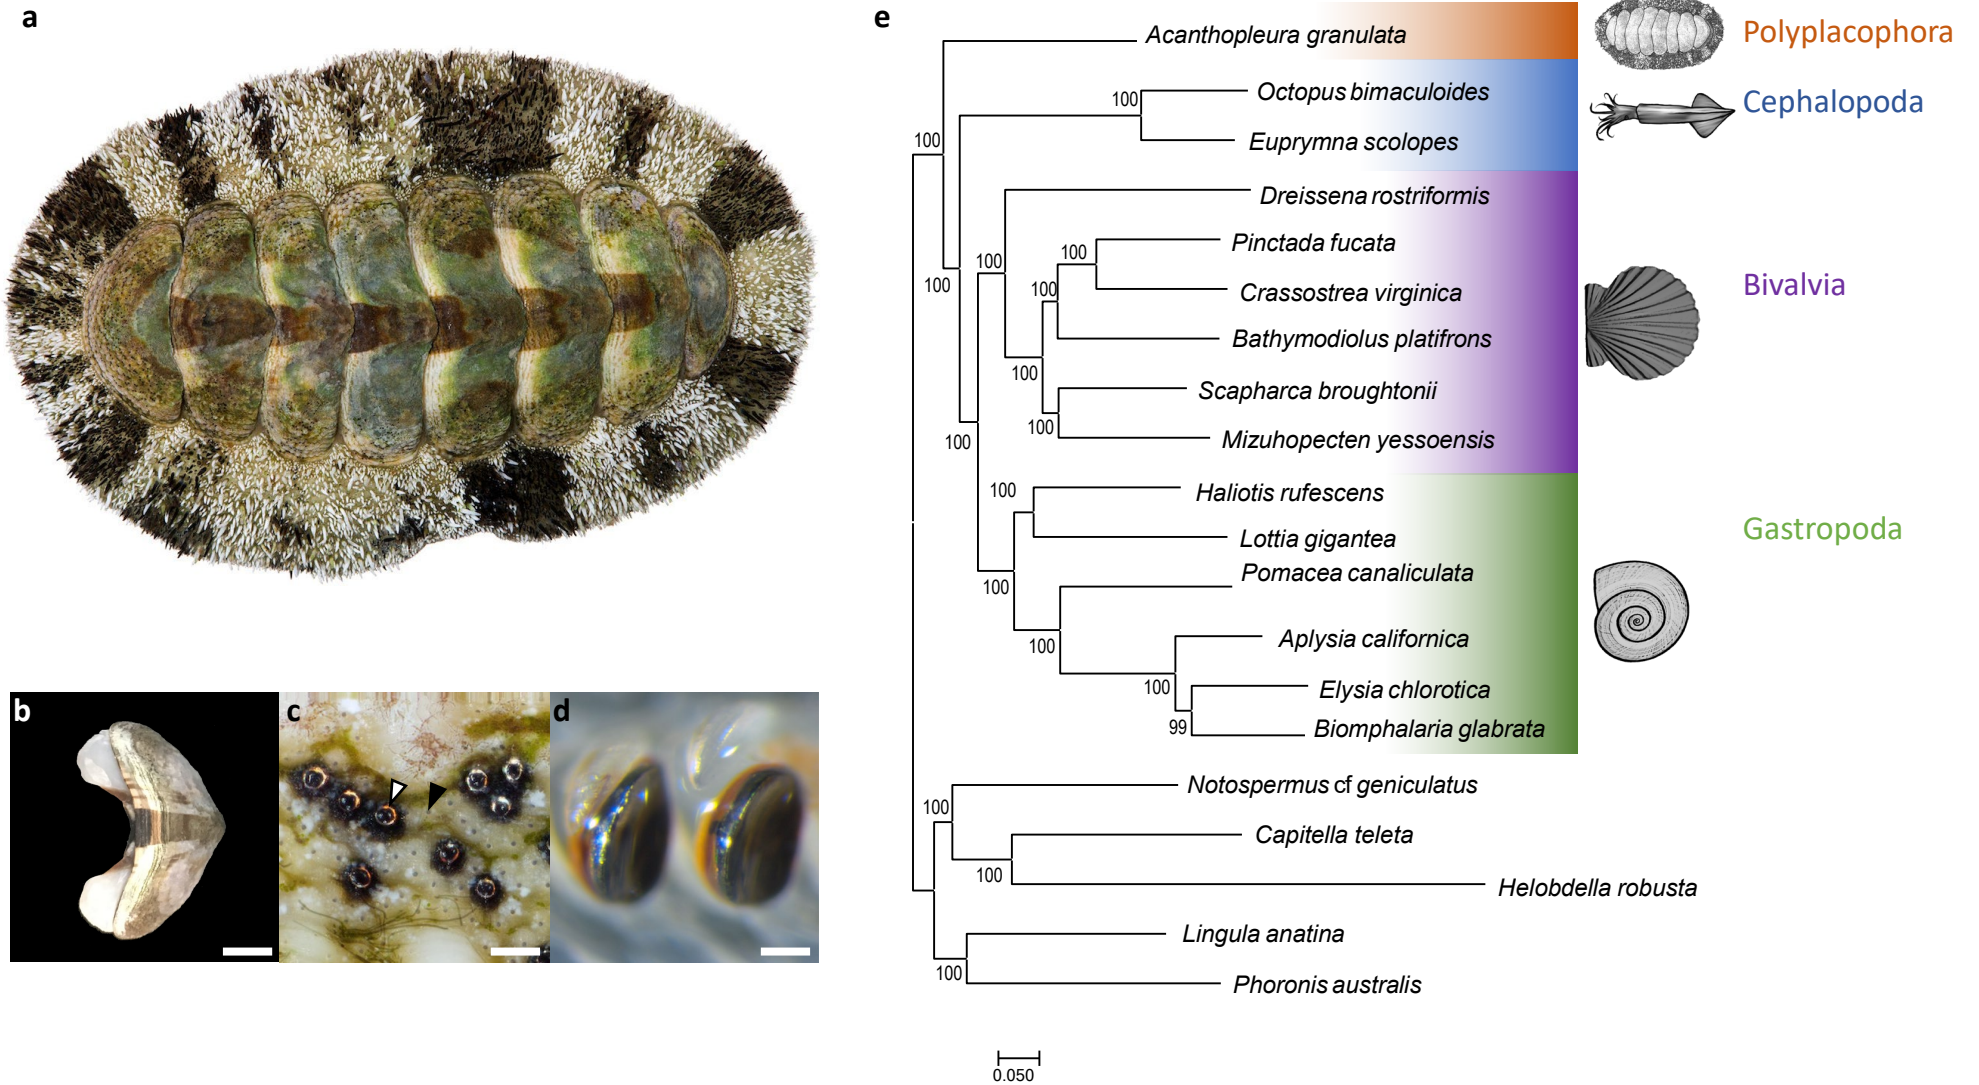

**Figure 1:** (a) The West Indian Fuzzy Chiton *Acanthopleura granulata*. Photograph by David Liittschwager. (b) A single shell plate from *A. granulata*. Scale bar indicates 5mm. (c) The eyes (white arrow) and aesthetes (black arrow) of *A. granulata*. Scale bar indicates 200  $\mu$ m. Photograph by David Liittschwager. (d) Teeth from the anterior-most region of the radula of *A. granulata*. The larger teeth, used for feeding, are mineralized with iron oxide (orange) and capped with magnetite (black). Scale bar indicates 300  $\mu$ m (e) A genome-based phylogeny of Mollusca showing chitons as sister to all other molluscs with available genomes.



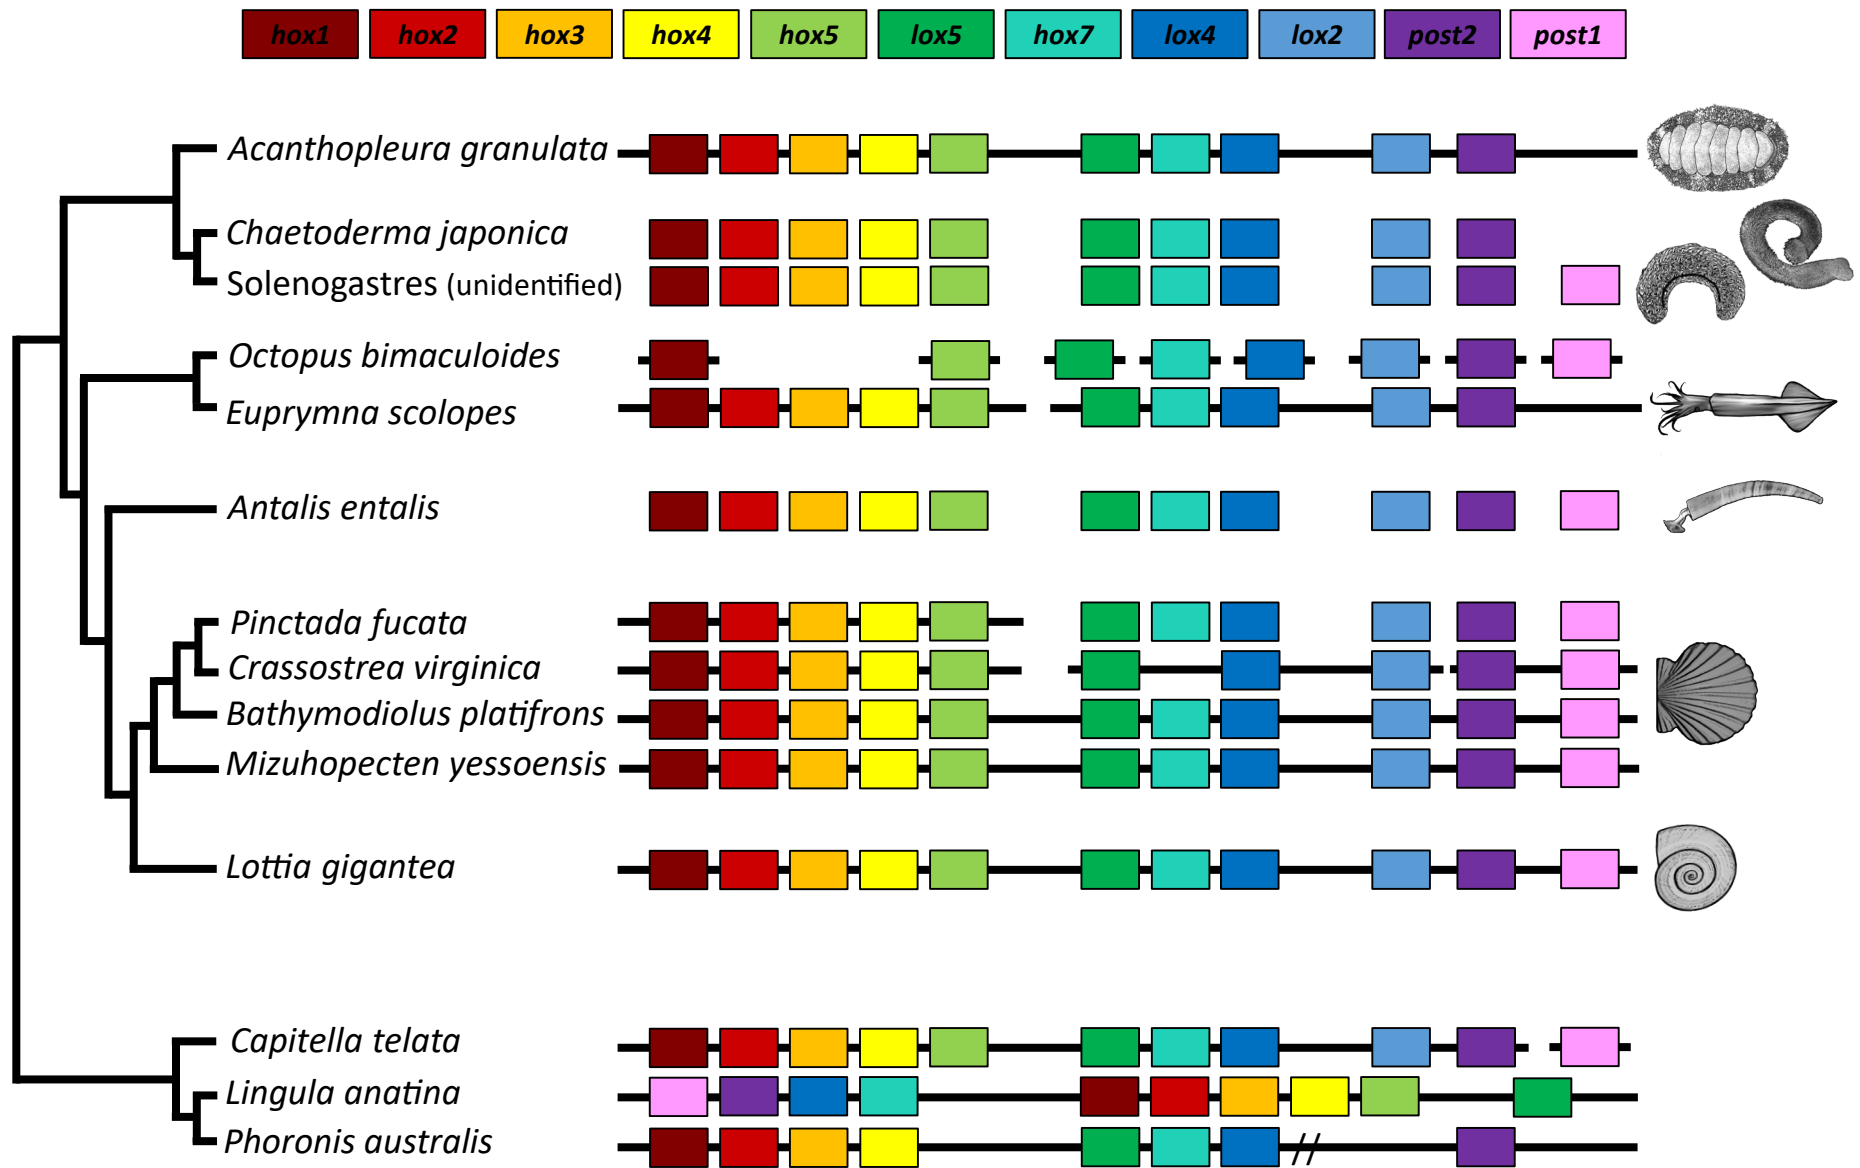

**Figure 2:** Synteny of Hox genes between *A. granulata* and other taxa. The presence of a gene is indicated by a box of the corresponding color. Continuous black lines indicate that the species has an available genome and Hox genes were located on a contiguous scaffold. Broken black lines indicate that gene(s) are located on multiple genomic scaffolds. A double slash indicates genes are located on a single contiguous scaffold but separated by greater distances than those in most other taxa.

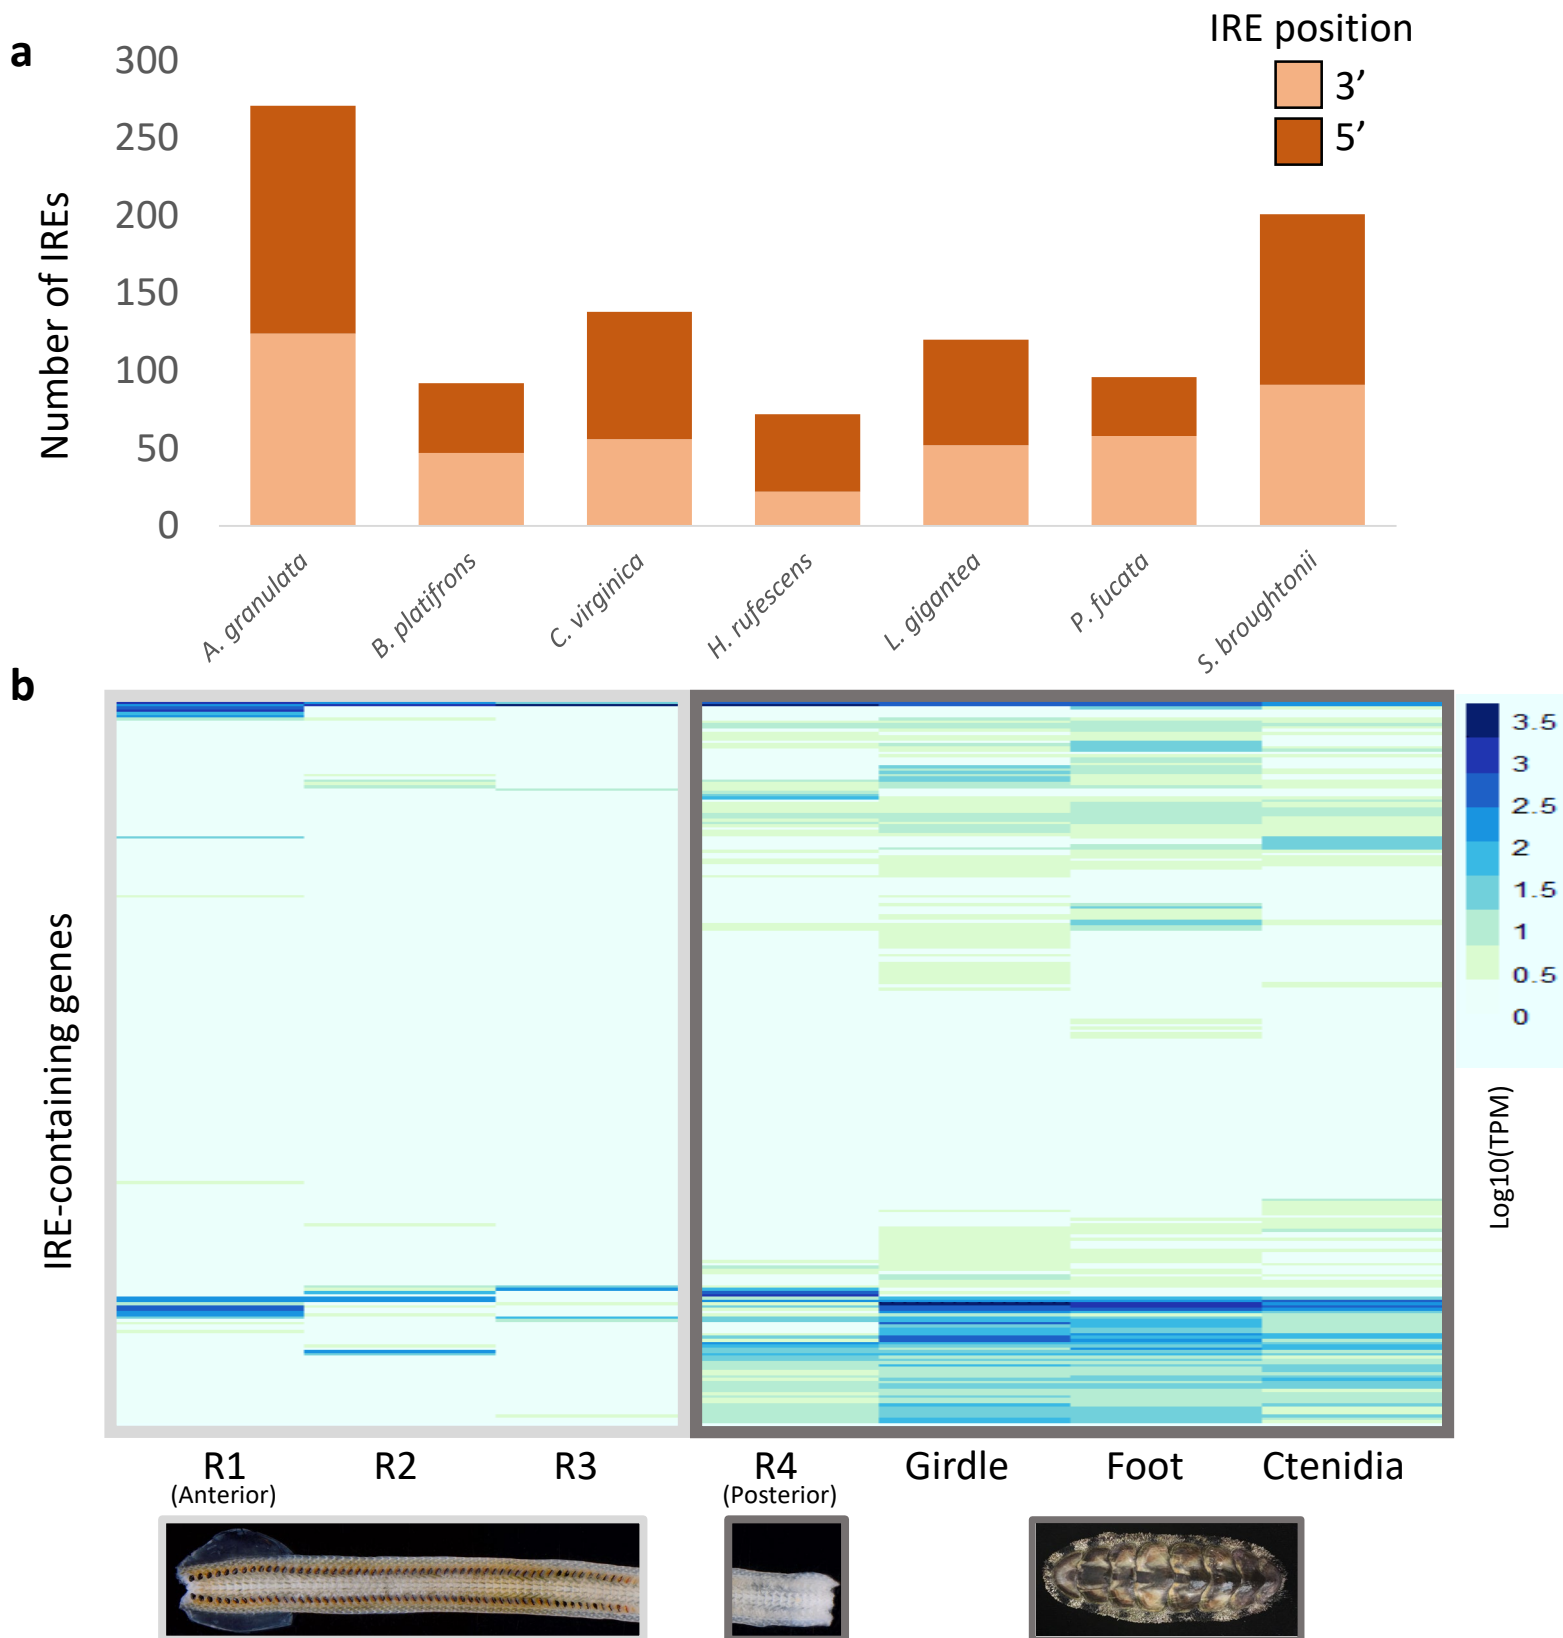

**Figure 3:** Iron response elements (IREs) in the *A. granulata* genome. **(a)** The number of IREs in several molluscan gene model sets, and relative proportions of 5' and 3' IREs. *A. granulata* has more IREs than all other molluscs examined, but the relative proportion of 5' and 3' IREs appears consistent across molluscan genomes. **(b)** The relative expression [ $\log_{10}(\text{TPM})$ ] of transcripts containing IREs in the different tissues of *A. granulata*. The radula is divided into four developmentally distinct regions: R1, the most anterior region, contains teeth used for feeding; R2 contains teeth that are developed but are not yet used for feeding; R3 contains developing teeth that contain iron oxide; and R4, the most posterior region, contains developing teeth that have yet to be coated with iron. We found lower expression of most IRE-containing genes in the anterior regions of the radula.

**a**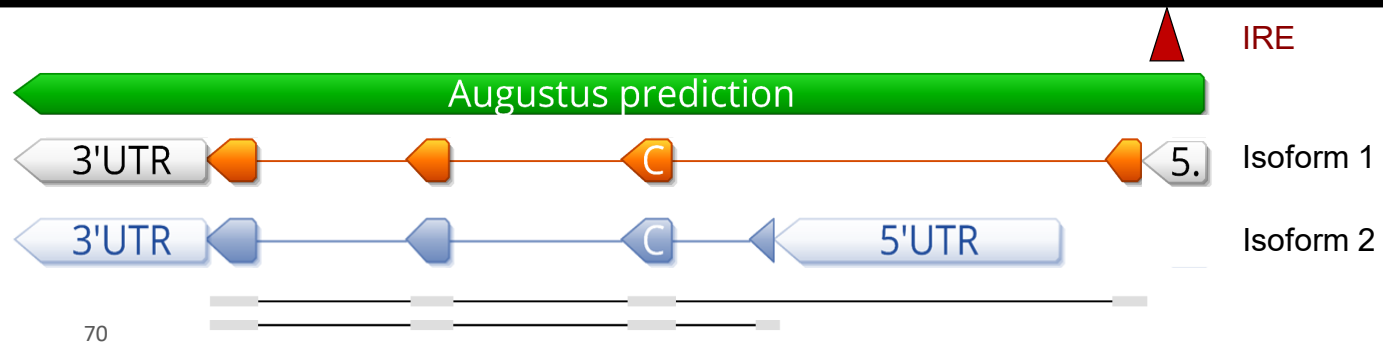**b**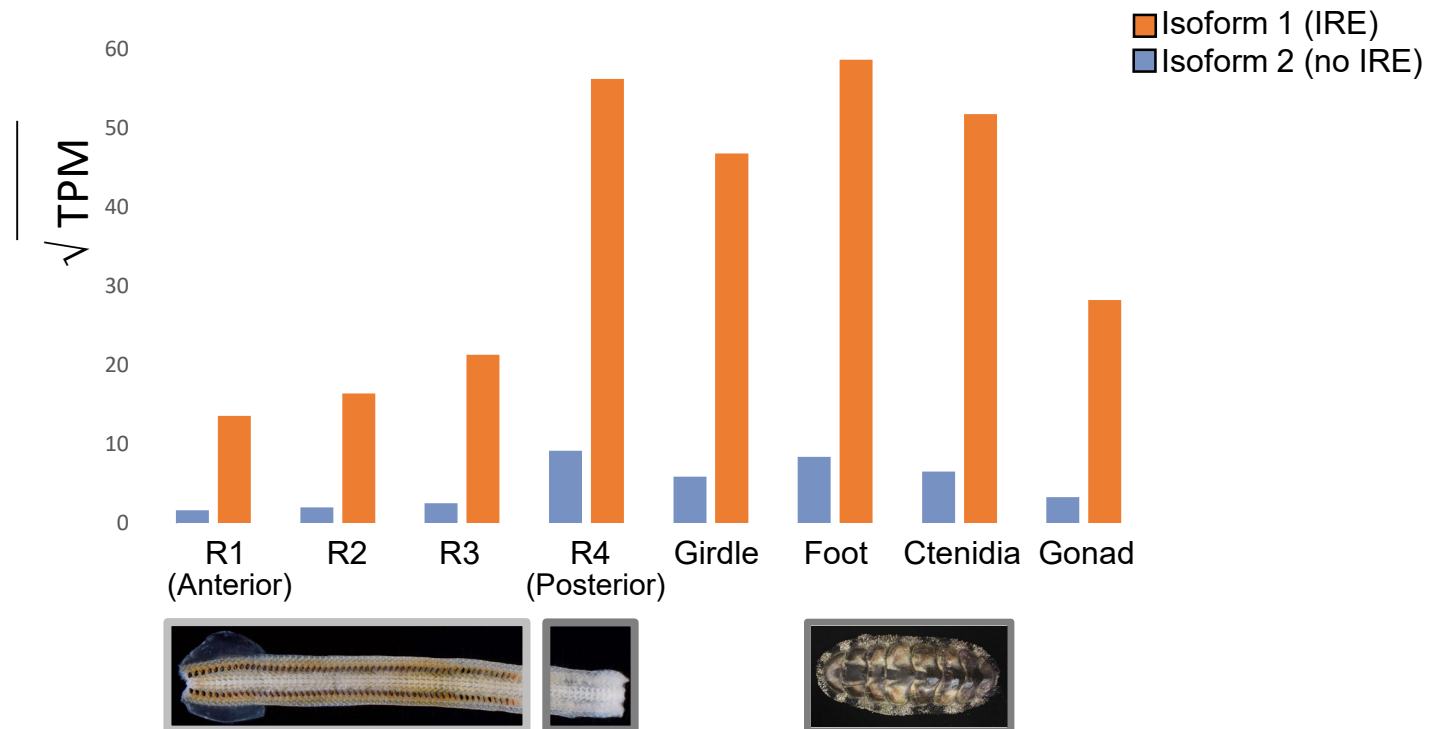

**Figure 4:** The two isoforms of heavy-chain ferritin recovered in *A. granulata*. **(a)** The locations of the transcription initiation sites and exons of isoform 1 of ferritin (orange, above) and isoform 2 of ferritin (blue, below). A 5' IRE (red) is present in the 5' untranslated region of isoform 1, but not in isoform 2. **(b)** Relative expression of both isoforms of ferritin across *A. granulata* tissues. The radula is divided into four developmentally distinct regions as in Figure 3. Isoform 1 is transcribed more highly throughout the body than isoform 2. Isoform 2 is transcribed at lower levels in the anterior (iron-rich) regions of the radula than in other tissues.
